# Supplementary material for: Reductive amination of carboxylic acids under H2 using a heterogeneous Pt–Mo catalyst
Source: Royal Society of Chemistry journal article supplement (doi:10.1039/d3gc02155f), 2023-12-22
Supplement: d3gc02155f1.pdf [file d3gc02155f1.pdf]

## Reductive amination of carboxylic acids under H<sub>2</sub> using a heterogeneous Pt–Mo catalyst

Katsumasa Sakoda,<sup>a</sup> Sho Yamaguchi,<sup>a,b</sup> Kazuki Honjo,<sup>a</sup> Yasutaka Kitagawa,<sup>a,b,c,d,e</sup>

Takato Mitsudome<sup>a,b,f</sup> and Tomoo Mizugaki<sup>\*a,b,c</sup>

\*Corresponding author: mizugaki.tomoo.es@osaka-u.ac.jp

<sup>a</sup> Department of Materials Engineering Science, Graduate School of Engineering Science, Osaka University, 1-3 Machikaneyama, Toyonaka, Osaka 560-8531, Japan

<sup>b</sup> Innovative Catalysis Science Division, Institute for Open and Transdisciplinary Research Initiatives (ICS-OTRI), Osaka University, Suita, Osaka 565-0871, Japan

<sup>c</sup> Research Center for Solar Energy Chemistry, Graduate School of Engineering Science, Osaka University, 1-3 Machikaneyama, Toyonaka, Osaka 560-8531, Japan

<sup>d</sup> Center for Quantum Information and Quantum Biology (QIQB), Osaka University, Toyonaka, Osaka 560-8531, Japan

<sup>e</sup> Spintronics Research Network Division, Institute for Open and Transdisciplinary Research Initiatives (SRN-OTRI), Osaka University, Toyonaka, Osaka 560-8531, Japan

<sup>f</sup> PRESTO, Japan Science and Technology Agency (JST), 4-1-8 Honcho, Kawaguchi, Saitama 333-0012, Japan

## Table of Content

|                                                                                                                                                                                                                                                                                                                                                                                                                                              |     |
|----------------------------------------------------------------------------------------------------------------------------------------------------------------------------------------------------------------------------------------------------------------------------------------------------------------------------------------------------------------------------------------------------------------------------------------------|-----|
| <b>1. General experimental details</b> .....                                                                                                                                                                                                                                                                                                                                                                                                 | S3  |
| <b>2. Catalyst preparation and reaction procedures</b> .....                                                                                                                                                                                                                                                                                                                                                                                 | S4  |
| <b>3. Supplementary tables</b> .....                                                                                                                                                                                                                                                                                                                                                                                                         | S7  |
| <b>Table S1</b> Investigation of catalyst preparation methods .....                                                                                                                                                                                                                                                                                                                                                                          | S7  |
| <b>Table S2</b> Investigation of pre-reduction effect.....                                                                                                                                                                                                                                                                                                                                                                                   | S7  |
| <b>Table S3</b> Investigation of support effect .....                                                                                                                                                                                                                                                                                                                                                                                        | S8  |
| <b>Table S4</b> SSA <sub>BET</sub> and acidity of Pt–Mo catalysts .....                                                                                                                                                                                                                                                                                                                                                                      | S9  |
| <b>Table S5</b> Reusability of Pt–Mo/ $\gamma$ -Al <sub>2</sub> O <sub>3</sub> and Pt–Mo/TiO <sub>2</sub> for the reductive amination.....                                                                                                                                                                                                                                                                                                   | S10 |
| <b>Table S6</b> ICP-AES and CHN analyses of fresh, 1st used, and 6th used Pt–Mo/ $\gamma$ -Al <sub>2</sub> O <sub>3</sub> .....                                                                                                                                                                                                                                                                                                              | S11 |
| <b>Table S7</b> EDX analyses of fresh, 1st used, and 6th used Pt–Mo/ $\gamma$ -Al <sub>2</sub> O <sub>3</sub> and Pt–Mo/TiO <sub>2</sub> .....                                                                                                                                                                                                                                                                                               | S11 |
| <b>Table S8</b> Previously reported catalysts for the reductive amination of carboxylic acids under H <sub>2</sub> .....                                                                                                                                                                                                                                                                                                                     | S12 |
| <b>Table S9</b> Detailed product analysis of the substrate scope of carboxylic acids with <b>1a</b> .....                                                                                                                                                                                                                                                                                                                                    | S13 |
| <b>Table S10</b> Detailed product analysis of the substrate scope of amines with <b>2a</b> .....                                                                                                                                                                                                                                                                                                                                             | S14 |
| <b>4. Supplementary figures</b> .....                                                                                                                                                                                                                                                                                                                                                                                                        | S15 |
| <b>Fig. S1</b> (a) NH <sub>3</sub> -TPD profiles of Pt–Mo/Support. Relationship between the yields of <b>3a</b> and (b) weak, (c) strong, and (d) total acid densities measured by NH <sub>3</sub> -TPD. Relationship between the yields of <b>3a</b> and (e) weak, (f) strong, and (g) total acid density amounts measured by NH <sub>3</sub> -TPD. NH <sub>3</sub> desorption was monitored by mass number $m/z = 16$ during heating. .... | S15 |
| <b>Fig. S2</b> XPS spectra in the Pt 4d <sub>5/2</sub> region of Pt–Mo/ $\gamma$ -Al <sub>2</sub> O <sub>3</sub> , Pt–Mo/TiO <sub>2</sub> , Pt–Mo/Nb <sub>2</sub> O <sub>5</sub> , Pt–Mo/SiO <sub>2</sub> , and Pt/ $\gamma$ -Al <sub>2</sub> O <sub>3</sub> . ....                                                                                                                                                                          | S16 |
| <b>Fig. S3</b> FT-IR spectra of fresh, 1st used, and 6th used Pt–Mo/ $\gamma$ -Al <sub>2</sub> O <sub>3</sub> .....                                                                                                                                                                                                                                                                                                                          | S17 |
| <b>Fig. S4</b> Linear combination fitting analysis of Mo K-edge XANES spectrum of reduced Pt–Mo/ $\gamma$ -Al <sub>2</sub> O <sub>3</sub> . ....                                                                                                                                                                                                                                                                                             | S17 |
| <b>Fig. S5</b> Time-course data of the Pt–Mo/ $\gamma$ -Al <sub>2</sub> O <sub>3</sub> catalyzed reductive amination of <b>2a</b> with <b>1a</b> to <b>3a</b> . Product distribution was determined based on (a) <b>1a</b> and (b) <b>2a</b> . ....                                                                                                                                                                                          | S18 |
| <b>Fig. S6</b> (a) <i>In situ</i> pyridine adsorption FT-IR analysis of Pt–Mo/ $\gamma$ -Al <sub>2</sub> O <sub>3</sub> , and Pt/ $\gamma$ -Al <sub>2</sub> O <sub>3</sub> , and (b) NH <sub>3</sub> -TPD profiles for Pt–M/ $\gamma$ -Al <sub>2</sub> O <sub>3</sub> (M = Mo, Re, W, or V) and Pt/ $\gamma$ -Al <sub>2</sub> O <sub>3</sub> . Acid amount is presented in parentheses. ....                                                 | S18 |
| <b>Fig. S7</b> Illustration of (a) model <b>A</b> and (b) model <b>B</b> .....                                                                                                                                                                                                                                                                                                                                                               | S19 |
| <b>5. Supplementary schemes</b> .....                                                                                                                                                                                                                                                                                                                                                                                                        | S22 |
| <b>Scheme S1</b> Control experiments. (a) Hydrogenation of <b>4b</b> . (b) Amination of 1-propanol with <b>1a</b> . (c) Reductive amination of propionaldehyde with <b>1a</b> .....                                                                                                                                                                                                                                                          | S22 |
| <b>Scheme S2</b> Proposed major reaction path for the reductive amination of <b>2a</b> with <b>1a</b> over a Pt–Mo/ $\gamma$ -Al <sub>2</sub> O <sub>3</sub> . ....                                                                                                                                                                                                                                                                          | S23 |
| <b>6. Product identification</b> .....                                                                                                                                                                                                                                                                                                                                                                                                       | S24 |
| <b>7. References</b> .....                                                                                                                                                                                                                                                                                                                                                                                                                   | S40 |

## 1. General experimental details

Organic chemicals were purchased from Fujifilm Wako Pure Chemical Industries, Ltd., Tokyo Chemical Industry Co., Ltd., and Sigma-Aldrich and were used as received.  $\text{H}_2\text{PtCl}_6$ ,  $\text{RuCl}_3$ ,  $\text{K}_3\text{RhCl}_6$ , and  $\text{Pd}(\text{NH}_3)_4\text{Cl}_2$  hydrates were obtained from N. E. Chemcat.  $(\text{NH}_4)_6\text{Mo}_7\text{O}_{24}\cdot 4\text{H}_2\text{O}$ ,  $\text{NH}_4\text{VO}_3$ ,  $(\text{NH}_4)_{10}(\text{H}_2\text{W}_{12}\text{O}_{42})\cdot 4\text{H}_2\text{O}$ , and  $\text{NaReO}_4$  were purchased from Nacalai Tesque, Kishida Chemical, Sigma-Aldrich, and Alfa Aesar Co., Ltd., respectively.  $\gamma\text{-Al}_2\text{O}_3$  was obtained from Sumitomo Chemical Co., Ltd.  $\alpha\text{-Al}_2\text{O}_3$  and  $\text{WO}_3$  were purchased from Fujifilm Wako Pure Chemical Industries, Ltd.  $\text{TiO}_2$  (JRC-TIO-2),  $\text{Nb}_2\text{O}_5$  (JRC-NBO-2),  $\text{ZrO}_2$  (JRC-ZRO-7), and  $\text{CeO}_2$  (JRC-CEO-2) were supplied by the Catalyst Society of Japan as reference catalysts.  $\text{SiO}_2$  (CARiACT, Q-6) was purchased from Fuji Silysia Chemical, Ltd. Gas chromatography (GC-FID) analyses were performed on a Shimadzu GC-2014 instrument equipped with a capillary column (InertCap for amines, GL Science, 30 m  $\times$  0.32 mm i.d.). Gas chromatography-mass spectrometry (GC-MS) analyses were performed on a Shimadzu QP-2010SE instrument equipped with a capillary column (SH-Rtx-200MS, Shimadzu, 30 m  $\times$  0.25 mm i.d. film thickness 0.25  $\mu\text{m}$ ).  $^1\text{H}$  and  $^{13}\text{C}$  nuclear magnetic resonance (NMR) spectra were recorded using a JEOL JNM-ESC400 spectrometer. Chemical shifts are reported as follows: 1,4-dioxane (3.76 ppm for  $^1\text{H}$  NMR, 67.15 ppm for  $^{13}\text{C}$  NMR) as an external standard in  $\text{D}_2\text{O}$  solvent, TMS (0 ppm for  $^1\text{H}$  NMR),  $\text{CDCl}_3$  (77.1 ppm for  $^{13}\text{C}$  NMR). NMR multiplicities are reported using the following abbreviations: s, singlet; d, doublet; t, triplet; q, quartet; m, multiplet; br, broad;  $J$ , coupling constants in hertz. The transmission electron microscopy images were obtained using a FEI Titan Cubed G2 60-300 or FEI Tecnai G2 20ST. Scanning transmission electron microscopy images with elemental maps were collected using a FEI Titan Cubed G2 60-300 instrument, operated at 300 kV, and equipped with a Super-X energy-dispersive X-ray spectroscopy (EDX) detector. Pt  $\text{L}_3$ -edge and Mo K-edge X-ray absorption spectra were recorded at room temperature in transmittance mode using Si (311) monochromators for the Pt  $\text{L}_3$ -edge and Mo K-edge at the 14B2 and 01B1 beam line stations at SPring-8, Japan Atomic Energy Research Institute (JASRI), Harima, Japan (promotion numbers: 2021B1945, 2022B1699, 2022B0519, and 2022B0586). Data analysis was performed using Demeter ver. 0.9.21. X-ray photoelectron spectroscopy (XPS) spectra of the samples were obtained using a ULVAC-PHI ESCA 3057 system, and the binding energy was referenced to the C 1s peak (285.0 eV). EDX measurements were performed using a Shimadzu EDX-7200 instrument. Inductively coupled plasma-atomic emission spectroscopy (ICP-AES) measurements were performed using a Perkin Elmer Optima 8300 instrument. CHN elemental analyses were performed using a Perkin Elmer 2400II CHNS/O. Fourier-transform infrared (FT-IR) spectra were recorded using a JASCO FT-IR 4100 spectrometer equipped with a mercury cadmium telluride detector. The CO adsorption, the single-point Brunauer–Emmett–Teller (BET), and the  $\text{NH}_3$ -temperature programmed desorption (TPD) data were measured using a BELCAT-A instrument (BEL Japan Inc.) equipped with a thermal conductivity detector or mass spectrometer (BELMASSII, BEL Japan Inc.).

## 2. Catalyst preparation and reaction procedures

### Preparation of metal oxide-supported Pt–Mo catalysts

The Pt–Mo/ $\gamma$ -Al<sub>2</sub>O<sub>3</sub> catalyst was prepared using a co-impregnation method. An aqueous solution of H<sub>2</sub>PtCl<sub>6</sub> (6.00 mL, 100 mM), (NH<sub>4</sub>)<sub>6</sub>Mo<sub>7</sub>O<sub>24</sub>·4H<sub>2</sub>O (2.00 mL, 75 mM) and  $\gamma$ -Al<sub>2</sub>O<sub>3</sub> (1.000 g) were added to distilled water (50 mL) at room temperature. After stirring for 12 h in air, water was removed by rotary evaporation under reduced pressure to obtain the solid product. The obtained powder was dried at 110 °C for 5 h. After drying, the product was calcined at 500 °C for 3 h under a static air atmosphere to obtain Pt–Mo/ $\gamma$ -Al<sub>2</sub>O<sub>3</sub> as a black powder. As determined using ICP-AES, the Pt and Mo contents in Pt–Mo/ $\gamma$ -Al<sub>2</sub>O<sub>3</sub> were 9.78 and 1.41 wt%, respectively. The other catalysts were prepared in a similar way using various metal salts and supports. All catalysts were applied to the reaction without any pre-reduction step.

### Preparation of Pt/Mo/ $\gamma$ -Al<sub>2</sub>O<sub>3</sub> and Mo/Pt/ $\gamma$ -Al<sub>2</sub>O<sub>3</sub> catalysts (Table S1)

The Pt/Mo/ $\gamma$ -Al<sub>2</sub>O<sub>3</sub> and Mo/Pt/ $\gamma$ -Al<sub>2</sub>O<sub>3</sub> catalysts were prepared using a sequential impregnation method. An aqueous solution of (NH<sub>4</sub>)<sub>6</sub>Mo<sub>7</sub>O<sub>24</sub>·4H<sub>2</sub>O (2.00 mL, 75 mM) and  $\gamma$ -Al<sub>2</sub>O<sub>3</sub> (1.000 g) were added to distilled water (50 mL) at room temperature. After stirring for 12 h in air, water was removed by rotary evaporation under reduced pressure to obtain the solid product. The obtained powder was dried at 110 °C for 5 h. After drying, the product and an aqueous solution of H<sub>2</sub>PtCl<sub>6</sub> (6.00 mL, 100 mM) were added to distilled water (50 mL) at room temperature and stirred for 12 h. Then, water was removed by rotary evaporation and the product was dried at 110 °C for 5 h. Finally, the obtained powder was calcined at 500 °C for 3 h under a static air atmosphere to obtain Pt/Mo/ $\gamma$ -Al<sub>2</sub>O<sub>3</sub> as a black powder. The Mo/Pt/ $\gamma$ -Al<sub>2</sub>O<sub>3</sub> catalyst were prepared in a similar way, changing the order of Pt and Mo precursor additions.

### Typical reductive amination procedure (Table 1, entry 1)

The reductive amination of acetic acid (**2a**) with piperidine (**1a**) was carried out in a 50 mL stainless steel autoclave equipped with a Teflon vessel. The vessel was charged with **1a** (0.085 g, 1.0 mmol), **2a** (0.180 g, 3.0 mmol), Pt–Mo/ $\gamma$ -Al<sub>2</sub>O<sub>3</sub> (0.150 g), *n*-hexane (3 mL), and a Teflon-coated magnetic stir bar was added. The reactor was sealed, purged five times with 1.0 MPa H<sub>2</sub>, and then pressurized (2.0 MPa), heated to 100 °C, and stirred at 900 rpm for 12 h. After the reaction, the autoclave was cooled in an ice-water bath, and H<sub>2</sub> gas was released. The resulting reaction mixture was diluted with 1-butanol and analyzed by GC-FID. Product yields were calculated based on **1a**.

### Catalyst reuse experiments (Fig. 1 and Table S5)

After the reductive amination was complete, the catalyst was separated from the reaction mixture by centrifugation, washed with ethanol and *n*-hexane in air before being reused in a subsequent reaction.

### Reductive amination under atmospheric H<sub>2</sub> pressure (Scheme 2a)

The reductive amination under atmospheric H<sub>2</sub> pressure was carried out in a Schlenk tube equipped with a balloon and condenser. The Schlenk tube was charged with **1a** (0.085 g, 1.0 mmol), **2a** (0.180 g, 3.0 mmol), Pt–Mo/γ-Al<sub>2</sub>O<sub>3</sub> (0.150 g), *n*-dodecane (3 mL), and a Teflon-coated magnetic stir bar was added. The reaction mixture was degassed twice by the freeze-pump-thaw method, filled with 0.1 MPa H<sub>2</sub>, heated to 140 °C, and stirred at 900 rpm for 24 h. After the reaction, the reactor was cooled, and H<sub>2</sub> gas was released. The resulting reaction mixture was diluted with 1-butanol and analyzed by GC-FID.

### Gram-scale reaction (Scheme 2b)

The gram-scale reductive amination was carried out in a 100 mL stainless steel autoclave equipped with a Teflon vessel. The vessel was charged with **1a** (1.00 g, 11.7 mmol), **2a** (2.00 g, 33.3 mmol), Pt–Mo/γ-Al<sub>2</sub>O<sub>3</sub> (0.150 g), *n*-hexane (10 mL), and a Teflon-coated magnetic stir bar was added. The reactor was purged five times with 1.0 MPa H<sub>2</sub> and then pressurized to 4.0 MPa at room temperature, heated to 160 °C, and stirred at 1000 rpm for 48 h. After the reaction, the autoclave was cooled in an ice-water bath, and the H<sub>2</sub> gas was carefully released. Pt–Mo/γ-Al<sub>2</sub>O<sub>3</sub> was separated by filtration, and hydrogen chloride solution (1.25 M, 1,4-dioxane) was added. The solvents were evaporated, washed with diethyl ether and water, then the water phase was gathered, evaporated, and dried to give pure hydrogen chloride salt **3a** (1.64 g, 10.9 mmol, 93%).

TON based on surface Pt atoms was described by the following equation:

$$TON = \frac{\text{mole of product}}{W_{\text{catalyst}} \times \frac{\text{Pt loading}}{\text{atomic weight of Pt}} \times \text{dispersion}} \quad (\text{eq. S1})$$

$W_{\text{catalyst}}$ : the gram of catalyst used in the reductive amination

Pt loading: the loading amount of Pt measured by ICP-AES analysis (Table S6)

dispersion: Pt dispersion measured by CO pulse chemisorption analysis (40.2%)

### Pt–Mo/γ-Al<sub>2</sub>O<sub>3</sub> pre-reduction (Fig. 2 and S3, and Table S2)

Pt–Mo/γ-Al<sub>2</sub>O<sub>3</sub> is pre-reduced for characterizations in Fig. 2 and S3, and control experiment in Table S2 under the typical reductive amination condition without substrates: Pt–Mo/γ-Al<sub>2</sub>O<sub>3</sub> (0.150 g), *n*-hexane (3 mL), 100 °C, H<sub>2</sub> (2.0 MPa), 2 h.

### Synthesis of *N*-propionylpiperidine (**4b**)

**4b** was prepared according to literature procedures.<sup>S1</sup> The Schlenk tube was charged with **1a** (2.00 g, 23.5 mmol), propionyl chloride (1.00 g, 10.8 mmol), and CHCl<sub>3</sub> (10 mL) in an ice-water bath, and a Teflon-coated magnetic stir bar was added. The reactor was heated to 80 °C, and stirred at 900 rpm for 2 h. After the reaction, the solvents were evaporated, washed with diethyl ether and water, then the organic phase was gathered, evaporated, and distilled to give pure **4b** (0.827 g, 5.87 mmol, 54%).

### 3. Supplementary tables

The influence of catalyst preparation method and H<sub>2</sub> pre-reduction was investigated. Pt/Mo/ $\gamma$ -Al<sub>2</sub>O<sub>3</sub> and Mo/Pt/ $\gamma$ -Al<sub>2</sub>O<sub>3</sub> prepared by the sequential impregnation method showed almost the same yields as that of co-impregnated Pt–Mo/ $\gamma$ -Al<sub>2</sub>O<sub>3</sub> under the typical reductive amination conditions (Table S1 entries 2 and 3 vs. entry 1). Pt–Mo/ $\gamma$ -Al<sub>2</sub>O<sub>3</sub> pre-reduced under 2 MPa H<sub>2</sub> for 2 h at 100 °C provided **3a** in 27% and 97% yield after 2 and 12 h, respectively. This result is comparable to that of untreated Pt–Mo/ $\gamma$ -Al<sub>2</sub>O<sub>3</sub> (Table S2, entries 3 and 4 vs. entries 1 and 2), indicating that the Pt and Mo species are easily reduced under the reaction conditions to form the active Pt and Mo species.

**Table S1** Investigation of catalyst preparation methods<sup>a</sup>

| entry | catalyst                                        | conv. of <b>1a</b> <sup>b</sup> [%] | yield <sup>b</sup> [%] |           |
|-------|-------------------------------------------------|-------------------------------------|------------------------|-----------|
|       |                                                 |                                     | <b>3a</b>              | <b>4a</b> |
| 1     | Pt–Mo/ $\gamma$ -Al <sub>2</sub> O <sub>3</sub> | >99                                 | 98                     | 0         |
| 2     | Pt/Mo/ $\gamma$ -Al <sub>2</sub> O <sub>3</sub> | >99                                 | 95                     | 0         |
| 3     | Mo/Pt/ $\gamma$ -Al <sub>2</sub> O <sub>3</sub> | >99                                 | 94                     | 0         |

<sup>a</sup> Reaction conditions: Pt–Mo catalyst (0.15 g, Pt: 8 mol% and Mo: 2 mol%), **1a** (1 mmol), **2a** (3 mmol), *n*-hexane (3 mL), 100 °C, H<sub>2</sub> (2 MPa), 12 h.

<sup>b</sup> Conversion and yield were determined by GC-FID using an internal standard.

**Table S2** Investigation of pre-reduction effect<sup>a</sup>

| entry | catalyst                                                             | reaction time (h) | conv. of <b>1a</b> <sup>b</sup> [%] | yield <sup>b</sup> [%] |           |
|-------|----------------------------------------------------------------------|-------------------|-------------------------------------|------------------------|-----------|
|       |                                                                      |                   |                                     | <b>3a</b>              | <b>4a</b> |
| 1     | Pt–Mo/ $\gamma$ -Al <sub>2</sub> O <sub>3</sub>                      | 2                 | 29                                  | 28                     | 0         |
| 2     | Pt–Mo/ $\gamma$ -Al <sub>2</sub> O <sub>3</sub>                      | 12                | >99                                 | 98                     | 0         |
| 3     | reduced Pt–Mo/ $\gamma$ -Al <sub>2</sub> O <sub>3</sub> <sup>c</sup> | 2                 | 27                                  | 27                     | 0         |
| 4     | reduced Pt–Mo/ $\gamma$ -Al <sub>2</sub> O <sub>3</sub> <sup>c</sup> | 12                | >99                                 | 97                     | 0         |

<sup>a</sup> Reaction conditions: Pt–Mo/ $\gamma$ -Al<sub>2</sub>O<sub>3</sub> (0.15 g, Pt: 8 mol% and Mo: 2 mol%), **1a** (1 mmol), **2a** (3 mmol), *n*-hexane (3 mL), 100 °C, H<sub>2</sub> (2 MPa). <sup>b</sup> Conversion and yield were determined by GC-FID using an internal standard. <sup>c</sup> Pre-reduction was performed under 2 MPa of H<sub>2</sub> at 100 °C for 2 h.

**Table S3** Investigation of support effect<sup>a</sup>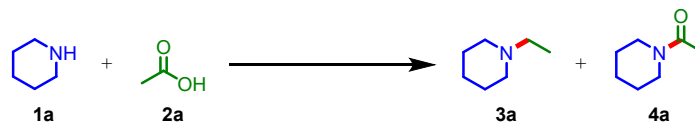

| catalyst                                        | loading amount <sup>b</sup> [wt%] |                | conv. of <b>1a</b> <sup>c</sup> [%] | yield <sup>c</sup> [%] |           | selectivity of <b>3a</b> [%] | TON <sup>d</sup> |
|-------------------------------------------------|-----------------------------------|----------------|-------------------------------------|------------------------|-----------|------------------------------|------------------|
|                                                 | Pt                                | Mo             |                                     | <b>3a</b>              | <b>4a</b> |                              |                  |
| Pt–Mo/ $\gamma$ -Al <sub>2</sub> O <sub>3</sub> | 10.3                              | 1.28           | 29                                  | 28                     | 0         | 97                           | 3.5              |
| Pt–Mo/ $\alpha$ -Al <sub>2</sub> O <sub>3</sub> | 6.93                              | 1.05           | 22                                  | 18                     | <1        | 82                           | 3.4              |
| Pt–Mo/TiO <sub>2</sub>                          | 7.25                              | 1.29           | 26                                  | 26                     | 0         | >99                          | 4.7              |
| Pt–Mo/Nb <sub>2</sub> O <sub>5</sub>            | 9.24                              | 1.36           | 30                                  | 22                     | 0         | 73                           | 3.1              |
| Pt–Mo/WO <sub>3</sub>                           | 8.09                              | 1.09           | 25                                  | 22                     | <1        | 88                           | 3.5              |
| Pt–Mo/ZrO <sub>2</sub>                          | 8.12                              | - <sup>e</sup> | 26                                  | 20                     | 0         | 77                           | 3.2              |
| Pt–Mo/CeO <sub>2</sub>                          | 9.91                              | 1.13           | 59                                  | 6                      | 0         | 10                           | 0.8              |
| Pt–Mo/SiO <sub>2</sub>                          | 8.08                              | 1.13           | 18                                  | 5                      | 0         | 28                           | 0.8              |

<sup>a</sup> Reaction conditions: Pt–Mo catalyst (0.15 g), **1a** (1 mmol), **2a** (3 mmol), *n*-hexane (3 mL), 100 °C, H<sub>2</sub> (2 MPa), 2 h.

<sup>b</sup> Loading amounts of Pt and Mo were measured by EDX. <sup>c</sup> Conversion and yield were determined by GC-FID using an internal standard. <sup>d</sup> TON was calculated based on total Pt atoms. <sup>e</sup> The Mo loading amount in Pt–Mo/ZrO<sub>2</sub> could not be determined because the characteristic X-rays of Mo K- $\alpha$  and Zr K- $\beta$  are overlapped.



**Table S4** SSA<sub>BET</sub> and acidity of Pt–Mo catalysts

| sample                                 | SAA <sub>BET</sub> <sup>a</sup> (m <sup>2</sup> /g) | acidity <sup>b</sup> (μmol/g) |        |       | acid density <sup>c</sup> (μmol/m <sup>2</sup> ) |        |       | acid amount <sup>d</sup> (μmol) |        |       |
|----------------------------------------|-----------------------------------------------------|-------------------------------|--------|-------|--------------------------------------------------|--------|-------|---------------------------------|--------|-------|
|                                        |                                                     | weak                          | strong | total | weak                                             | strong | total | weak                            | strong | total |
| Pt–Mo/γ-Al <sub>2</sub> O <sub>3</sub> | 120.9                                               | 84.7                          | 43.0   | 127.7 | 0.7                                              | 0.4    | 1.1   | 12.7                            | 6.4    | 19.2  |
| Pt–Mo/α-Al <sub>2</sub> O <sub>3</sub> | 15.9                                                | 11.6                          | 6.9    | 18.5  | 0.7                                              | 0.4    | 1.1   | 1.7                             | 1.0    | 2.7   |
| Pt–Mo/TiO <sub>2</sub>                 | 22.1                                                | 13.6                          | 15.0   | 28.6  | 0.6                                              | 0.7    | 1.3   | 2.0                             | 2.3    | 4.3   |
| Pt–Mo/Nb <sub>2</sub> O <sub>5</sub>   | 9.2                                                 | 5.3                           | 7.4    | 12.7  | 0.6                                              | 0.8    | 1.4   | 0.8                             | 1.1    | 1.9   |
| Pt–Mo/WO <sub>3</sub>                  | 13.1                                                | 5.5                           | 9.8    | 15.3  | 0.4                                              | 0.8    | 1.2   | 0.8                             | 1.5    | 2.3   |
| Pt–Mo/ZrO <sub>2</sub>                 | 26.8                                                | 14.6                          | 18.1   | 32.7  | 0.5                                              | 0.7    | 1.2   | 2.2                             | 2.7    | 4.9   |
| Pt–Mo/CeO <sub>2</sub>                 | 95.2                                                | 110.6                         | 29.0   | 139.6 | 1.2                                              | 0.3    | 1.5   | 16.6                            | 4.4    | 21.0  |
| Pt–Mo/SiO <sub>2</sub>                 | 433.9                                               | 73.0                          | 0.0    | 73.0  | 0.2                                              | 0.0    | 0.2   | 11.0                            | 0.0    | 11.0  |
| Pt/γ-Al <sub>2</sub> O <sub>3</sub>    | 131.8                                               | 121.6                         | 36.9   | 158.5 | 0.9                                              | 0.3    | 1.2   | 18.2                            | 5.5    | 23.7  |
| Mo/γ-Al <sub>2</sub> O <sub>3</sub>    | 138.9                                               | 146.3                         | 25.5   | 171.8 | 1.1                                              | 0.2    | 1.3   | 21.9                            | 3.8    | 25.7  |
| γ-Al <sub>2</sub> O <sub>3</sub>       | 154.8                                               | 116.9                         | 69.2   | 186.1 | 0.8                                              | 0.4    | 1.2   | 17.5                            | 10.4   | 27.9  |

<sup>a</sup> Measured by the single-point BET method. <sup>b</sup> Measured by NH<sub>3</sub>-TPD. <sup>c</sup> Calculated based on “acidity (μmol/g)” / “SSA<sub>BET</sub> (m<sup>2</sup>/g)”. <sup>d</sup> Acid amount in the reaction system calculated based on “acidity (μmol/g)” × “The weight of catalyst used (0.150 g)”.

**Table S5** Reusability of Pt–Mo/ $\gamma$ -Al<sub>2</sub>O<sub>3</sub> and Pt–Mo/TiO<sub>2</sub> for the reductive amination<sup>a</sup>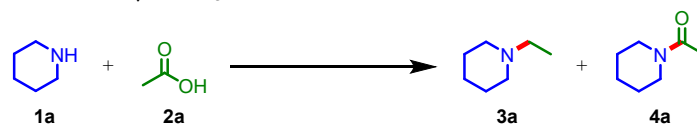

| entry | catalyst                                        | run | conv. of <b>1a</b> <sup>b</sup> [%] | yield <sup>b</sup> [%] |           | TON <sup>c</sup> | total TON |
|-------|-------------------------------------------------|-----|-------------------------------------|------------------------|-----------|------------------|-----------|
|       |                                                 |     |                                     | <b>3a</b>              | <b>4a</b> |                  |           |
| 1     | Pt–Mo/ $\gamma$ -Al <sub>2</sub> O <sub>3</sub> | 1st | >99                                 | 97                     | 1         | 12               | 70        |
| 2     |                                                 | 2nd | >99                                 | 97                     | 1         | 12               |           |
| 3     |                                                 | 3rd | 93                                  | 92                     | 1         | 12               |           |
| 4     |                                                 | 4th | 91                                  | 90                     | 1         | 11               |           |
| 5     |                                                 | 5th | 94                                  | 93                     | 1         | 12               |           |
| 6     |                                                 | 6th | 86                                  | 85                     | 1         | 11               |           |
| 7     | Pt–Mo/TiO <sub>2</sub>                          | 1st | >99                                 | >99                    | 0         | 18               | 45        |
| 8     |                                                 | 2nd | 42                                  | 42                     | 0         | 8                |           |
| 9     |                                                 | 3rd | 34                                  | 34                     | 0         | 6                |           |
| 10    |                                                 | 4th | 39                                  | 35                     | 0         | 6                |           |
| 11    |                                                 | 5th | 33                                  | 25                     | 0         | 4                |           |
| 12    |                                                 | 6th | 20                                  | 18                     | 0         | 3                |           |

<sup>a</sup> Reaction conditions: Pt–Mo catalyst (0.15 g), **1a** (1 mmol), **2a** (3 mmol), *n*-hexane (3 mL), 100 °C, H<sub>2</sub> (2 MPa), 12 h. <sup>b</sup> Conversion and yield were determined by GC-FID using an internal standard. <sup>c</sup> Based on total Pt atoms measured by EDX (Pt–Mo/ $\gamma$ -Al<sub>2</sub>O<sub>3</sub>: 10.3 wt%, Pt–Mo/TiO<sub>2</sub>: 7.25 wt%).

The reason for the deactivation of Pt–Mo catalysts was investigated. Inductively coupled plasma-atomic emission spectroscopy analysis of the Pt–Mo/ $\gamma$ -Al<sub>2</sub>O<sub>3</sub> catalyst after the 1st and 6th runs showed that the metal contents decrease compared to those of the fresh catalyst (Table S6). CHN analysis revealed an increase in the C and H contents before and after the reaction, indicating accumulation of organic species on the catalyst surface (see Fig. S3 for details). To exclude the influence of adsorbed species, the Pt/Al, Mo/Al, and Mo/Pt atomic ratios of Pt–Mo/ $\gamma$ -Al<sub>2</sub>O<sub>3</sub> were calculated. The atomic ratio of Pt/Al was almost constant even after 6th run, indicating leaching of Pt species is negligible. Regarding the Mo/Al and Mo/Pt atomic ratios, the fresh catalyst and that after the 1st run showed similar ratio, while that after the 6th run exhibited lower values. We also examined the EDX measurement of Pt–Mo/TiO<sub>2</sub>, and the Mo/Ti and Mo/Pt atomic ratios were significantly decreased even after the 1st run compared to that of fresh catalyst (Table S7). These results clearly show that  $\gamma$ -Al<sub>2</sub>O<sub>3</sub> support effectively suppress the leaching of Mo species into the reaction mixture during the reductive amination.

**Table S6** ICP-AES and CHN analyses of fresh, 1st used, and 6th used Pt–Mo/ $\gamma$ -Al<sub>2</sub>O<sub>3</sub>

| sample                                                   | amount [wt%] |      |      |       |      |      | atomic ratio |       |       |
|----------------------------------------------------------|--------------|------|------|-------|------|------|--------------|-------|-------|
|                                                          | Pt           | Mo   | Al   | C     | H    | N    | Pt/Al        | Mo/Al | Mo/Pt |
| fresh Pt–Mo/ $\gamma$ -Al <sub>2</sub> O <sub>3</sub>    | 10.1         | 1.42 | 42.0 | 0.05  | 0.47 | 0.08 | 0.033        | 0.010 | 0.29  |
| 1st used Pt–Mo/ $\gamma$ -Al <sub>2</sub> O <sub>3</sub> | 9.67         | 1.30 | 38.7 | 4.13  | 0.80 | 0.14 | 0.035        | 0.010 | 0.27  |
| 6th used Pt–Mo/ $\gamma$ -Al <sub>2</sub> O <sub>3</sub> | 5.89         | 0.42 | 28.0 | 15.66 | 2.23 | 0.13 | 0.029        | 0.004 | 0.15  |

**Table S7** EDX analyses of fresh, 1st used, and 6th used Pt–Mo/ $\gamma$ -Al<sub>2</sub>O<sub>3</sub> and Pt–Mo/TiO<sub>2</sub>

| sample                                                   | atomic ratio |       |       |       |       |
|----------------------------------------------------------|--------------|-------|-------|-------|-------|
|                                                          | Pt/Al        | Mo/Al | Pt/Ti | Mo/Ti | Mo/Pt |
| fresh Pt–Mo/ $\gamma$ -Al <sub>2</sub> O <sub>3</sub>    | 0.041        | 0.011 | -     | -     | 0.26  |
| 1st used Pt–Mo/ $\gamma$ -Al <sub>2</sub> O <sub>3</sub> | 0.041        | 0.011 | -     | -     | 0.25  |
| 6th used Pt–Mo/ $\gamma$ -Al <sub>2</sub> O <sub>3</sub> | 0.042        | 0.006 | -     | -     | 0.14  |
| fresh Pt–Mo/TiO <sub>2</sub>                             | -            | -     | 0.034 | 0.014 | 0.40  |
| 1st used Pt–Mo/TiO <sub>2</sub>                          | -            | -     | 0.036 | 0.010 | 0.29  |
| 6th used Pt–Mo/TiO <sub>2</sub>                          | -            | -     | 0.034 | 0.006 | 0.16  |

**Table S8** Previously reported catalysts for the reductive amination of carboxylic acids under H<sub>2</sub>

| catalyst                                                                      | amine                                                                              | carboxylic acid                                                                     | product                                                                               | reaction conditions                                        | TON <sup>a</sup>       | ref.                                 |
|-------------------------------------------------------------------------------|------------------------------------------------------------------------------------|-------------------------------------------------------------------------------------|---------------------------------------------------------------------------------------|------------------------------------------------------------|------------------------|--------------------------------------|
| Pt–Mo/ $\gamma$ -Al <sub>2</sub> O <sub>3</sub>                               |   |    |    | <i>n</i> -hexane, 2 MPa H <sub>2</sub><br>100 °C, 12 h     | 13 (32) <sup>b</sup>   | <b>this work</b><br>Table 1, entry 1 |
| Pt–Mo/ $\gamma$ -Al <sub>2</sub> O <sub>3</sub>                               |   |    |    | <i>n</i> -dodecane, 0.1 MPa H <sub>2</sub><br>140 °C, 24 h | 9 (23) <sup>b</sup>    | <b>this work</b><br>Scheme 2a        |
| Pt–Mo/ $\gamma$ -Al <sub>2</sub> O <sub>3</sub>                               |   |    |    | <i>n</i> -hexane, 4 MPa H <sub>2</sub><br>160 °C, 48 h     | 146 (363) <sup>b</sup> | <b>this work</b><br>Scheme 2b        |
| [Ru <sub>2</sub> (triphos) <sub>2</sub> Cl <sub>3</sub> ]Cl                   | NH <sub>3</sub>                                                                    |    |    | THF, 4 MPa H <sub>2</sub><br>164 °C, 14 h                  | 93                     | S2                                   |
| Ru(acac) <sub>3</sub> , triphos <sup>c</sup> , HNTf <sub>2</sub> <sup>d</sup> |   |    |    | THF, 6 MPa H <sub>2</sub><br>160 °C, 18 h                  | 42                     | S3                                   |
| Ru(acac) <sub>3</sub> , triphos <sup>c</sup> , MSA <sup>e</sup>               | NH <sub>3</sub>                                                                    |    |    | 1,4-dioxane, 1 MPa H <sub>2</sub><br>220 °C, 88 h          | 33                     | S4                                   |
| Ru(acac) <sub>3</sub> , triphos <sup>c</sup> , MSA <sup>e</sup>               |   |    |    | 1,4-dioxane, 1 MPa H <sub>2</sub><br>220 °C, 42 h          | 49                     | S5                                   |
| Re/TiO <sub>2</sub>                                                           |   |    |    | octane, 5 MPa H <sub>2</sub><br>200 °C, 48 h               | 41                     | S6                                   |
| Co(BF <sub>4</sub> ) <sub>2</sub> ·6H <sub>2</sub> O, L1 <sup>f</sup>         |   |    |    | 1,4-dioxane, 4 MPa H <sub>2</sub><br>100 °C, 24 h          | 30                     | S7                                   |
| Co(BF <sub>4</sub> ) <sub>2</sub> ·6H <sub>2</sub> O, triphos <sup>c</sup>    |  |   |   | CPME <sup>g</sup> , 6 MPa H <sub>2</sub><br>140 °C, 24 h   | 15                     | S8                                   |
| RuWO <sub>x</sub> /MgAl <sub>2</sub> O <sub>4</sub>                           | NH <sub>3</sub>                                                                    |  |  | CPME <sup>g</sup> , 5 MPa H <sub>2</sub><br>200 °C, 6.5 h  | 16                     | S9                                   |
| Au/TiO <sub>2</sub>                                                           | NH <sub>3</sub>                                                                    |  |  | CPME <sup>g</sup> , 3 MPa H <sub>2</sub><br>200 °C, 70 h   | 257                    | S10                                  |

<sup>a</sup> TON was calculated based on total metal loading. <sup>b</sup> Based on total Pt atoms measured by ICP-AES analysis in Table S6 (10.1 wt%); based on surface Pt atoms in parentheses. <sup>c</sup> (1,1,1-tris(diphenylphosphinomethyl)ethane. <sup>d</sup> Trifluoromethanesulfonimide. <sup>e</sup> Methane sulphonic acid. <sup>f</sup> CH<sub>3</sub>C(CH<sub>2</sub>PPh'<sub>2</sub>)<sub>3</sub> (Ph' = *p*-anisole) <sup>g</sup> Cyclopentyl methyl ether.

**Table S9** Detailed product analysis of the substrate scope of carboxylic acids with **1a**

| carboxylic acid                                                                   | conditions                          | conv. of <b>1a</b> (%) | product and yield (%)                                                                                                                                                                      |
|-----------------------------------------------------------------------------------|-------------------------------------|------------------------|--------------------------------------------------------------------------------------------------------------------------------------------------------------------------------------------|
| 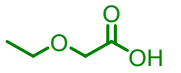 | 2 MPa H <sub>2</sub> , 140 °C, 20 h | >99                    |  (59)  (33)          |
|  | 2 MPa H <sub>2</sub> , 140 °C, 20 h | >99                    |  (48)  (16)          |
|  | 2 MPa H <sub>2</sub> , 160 °C, 30 h | >99                    |  (43)  (25)          |
|  | 2 MPa H <sub>2</sub> , 160 °C, 50 h | 44                     |  <1  39 <sup>a</sup> |
|  | 2 MPa H <sub>2</sub> , 100 °C, 12 h | 77                     |  <1  71              |
|  | 2 MPa H <sub>2</sub> , 100 °C, 12 h | 19                     |  <1                                                                                                     |

Conversion and yield were determined by GC-FID using an internal standard and calculated based on the **1a**. The yields in parentheses were based on <sup>1</sup>H NMR analysis. <sup>a</sup> The yield was calculated based on the carboxylic acid.

**Table S10** Detailed product analysis of the substrate scope of amines with **2a**

| amine                                                                              | conditions                                       | conv. of <b>1a</b> (%) | product and yield (%)                                                                |     |                                                                                      |    |                                                                                        |
|------------------------------------------------------------------------------------|--------------------------------------------------|------------------------|--------------------------------------------------------------------------------------|-----|--------------------------------------------------------------------------------------|----|----------------------------------------------------------------------------------------|
| 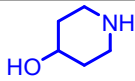  | 2 MPa H <sub>2</sub> , 120 °C, 24 h              | >99                    |   | 83  |   | 11 |                                                                                        |
|   | 4 MPa H <sub>2</sub> , 100 °C, 12 h              | 98                     |   | 81  |   | 5  |                                                                                        |
|   | 2 MPa H <sub>2</sub> , 140 °C, 24 h              | 25                     |   | (7) |                                                                                      |    |                                                                                        |
|   | 2 MPa H <sub>2</sub> , 100 °C, 16 h <sup>a</sup> | 99                     |   | 90  |   | 8  |                                                                                        |
|   | 2 MPa H <sub>2</sub> , 140 °C, 24 h <sup>b</sup> | 87                     |   | 58  |   | 21 |                                                                                        |
|   | 3 MPa H <sub>2</sub> , 100 °C, 16 h <sup>a</sup> | >99                    |   | 40  |   | 11 |                                                                                        |
|  | 3 MPa H <sub>2</sub> , 120 °C, 18 h              | >99                    |  | 55  |  | 18 |  2 |

Conversion and yield were determined by GC-FID using an internal standard and calculated based on the amines. The yields in parentheses were based on <sup>1</sup>H NMR analysis. <sup>a</sup> **2a** (4 mmol). <sup>b</sup> **2a** (5 mmol).

#### 4. Supplementary figures

To investigate support effect, NH<sub>3</sub>-TPD and XPS analyses of Pt–Mo catalysts were carried out (Fig. S1). The yields of **3a** in Table S3 were plotted against the weak, strong, and total acid densities and amounts in the reaction system in Table S4, as shown in Fig. S1b–g. These data indicate that the acid densities are positively correlated with the yield of **3a**; especially, this tendency is clearly observed in the case of strong acid density (Fig. S1b–d). In the proposed mechanism as shown in Scheme S2, acid sites may promote the enamine formation from hemiaminal, i.e., step VIb. Use of the supports with high acid density enhance the number of acid sites closely located in the vicinity of Pt–Mo sites, which may contribute to the efficient reductive amination of carboxylic acids. In the XPS spectrum of Pt–Mo/ $\gamma$ -Al<sub>2</sub>O<sub>3</sub> in the Pt 4d<sub>5/2</sub> region, a Pt 4d<sub>5/2</sub> peak was observed at 315.3 eV, which is lower than that of Pt/ $\gamma$ -Al<sub>2</sub>O<sub>3</sub> observed at 315.8 eV (Fig. S2). The spectra of Pt–Mo/Nb<sub>2</sub>O<sub>5</sub> and Pt–Mo/SiO<sub>2</sub> exhibited peaks at similar binding energy with Pt–Mo/ $\gamma$ -Al<sub>2</sub>O<sub>3</sub>. In addition, the Pt 4d<sub>5/2</sub> peak of Pt–Mo/TiO<sub>2</sub> appeared at a slightly lower binding energy of 314.6 eV. The presence of negatively charged Pt species of Pt–Mo/TiO<sub>2</sub> may increase H<sub>2</sub> activation ability of Pt nanoparticle in 1st run (Scheme S2, step II).

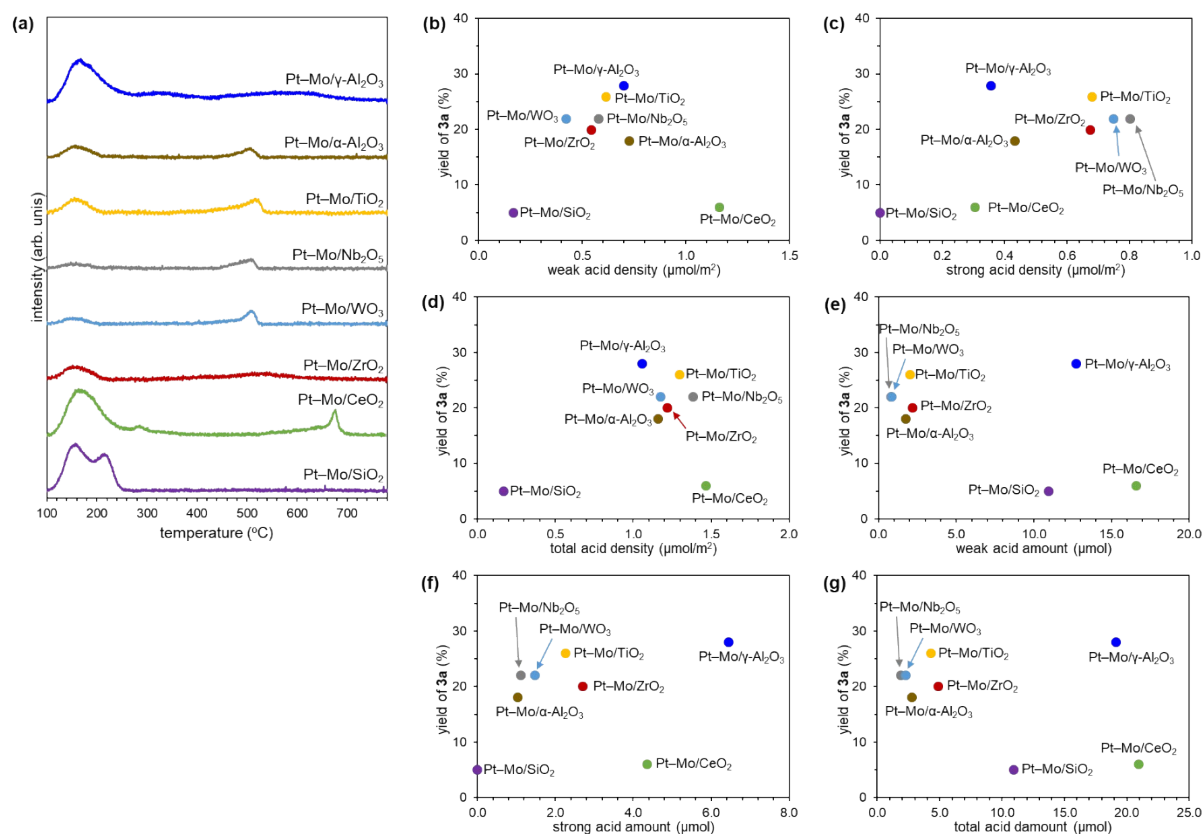

**Fig. S1** (a) NH<sub>3</sub>-TPD profiles of Pt–Mo/Support. Relationship between the yields of **3a** and (b) weak, (c) strong, and (d) total acid densities measured by NH<sub>3</sub>-TPD. Relationship between the yields of **3a** and (e) weak, (f) strong, and (g) total acid amounts measured by NH<sub>3</sub>-TPD. NH<sub>3</sub> desorption was monitored by mass number  $m/z = 16$  during heating.

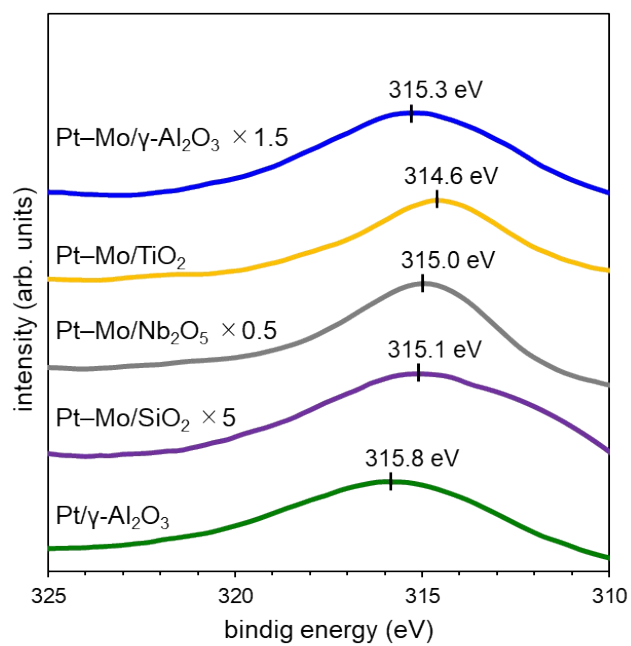

**Fig. S2** XPS spectra in the Pt 4d<sub>5/2</sub> region of Pt-Mo/ $\gamma$ -Al<sub>2</sub>O<sub>3</sub>, Pt-Mo/TiO<sub>2</sub>, Pt-Mo/Nb<sub>2</sub>O<sub>5</sub>, Pt-Mo/SiO<sub>2</sub>, and Pt/ $\gamma$ -Al<sub>2</sub>O<sub>3</sub>.



To clarify the adsorbed organics, we conducted FT-IR analysis of the used catalysts (Fig. S3). The IR spectrum of the 6th used Pt–Mo/ $\gamma$ -Al<sub>2</sub>O<sub>3</sub> showed two strong absorption bands at 1583 and 1476 cm<sup>-1</sup> assignable to the C–O stretching mode of the bidentate acetate species.<sup>S11,S12</sup> Thus, the decreases in the apparent metal contents was caused by adsorption of bidentate acetate species.

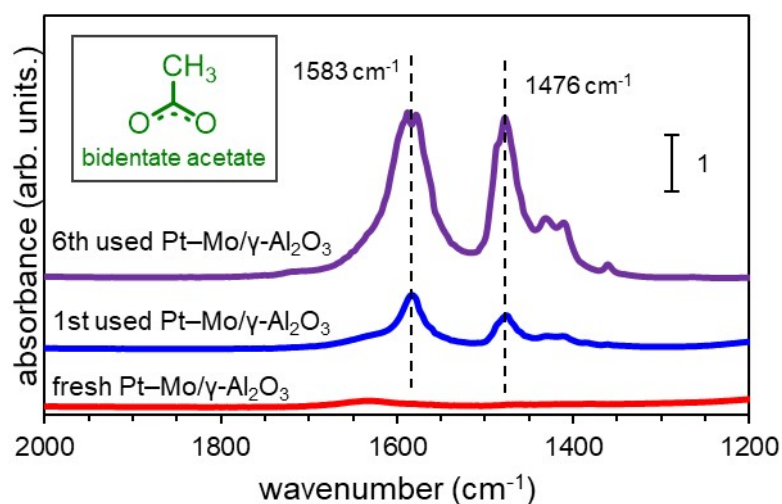

**Fig. S3** FT-IR spectra of fresh, 1st used, and 6th used Pt–Mo/ $\gamma$ -Al<sub>2</sub>O<sub>3</sub>.

Fig. S4 shows Mo K-edge XANES pattern fitting analysis of reduced Pt–Mo/ $\gamma$ -Al<sub>2</sub>O<sub>3</sub>. Mo<sub>2</sub>C, MoO<sub>2</sub> and MoO<sub>3</sub> were used as standards for the Mo<sup>2+</sup>, Mo<sup>4+</sup>, and Mo<sup>6+</sup> oxidation states, respectively. This result indicates that the ratio of Mo<sup>2+</sup>, Mo<sup>4+</sup>, and Mo<sup>6+</sup> were 42:40:18.

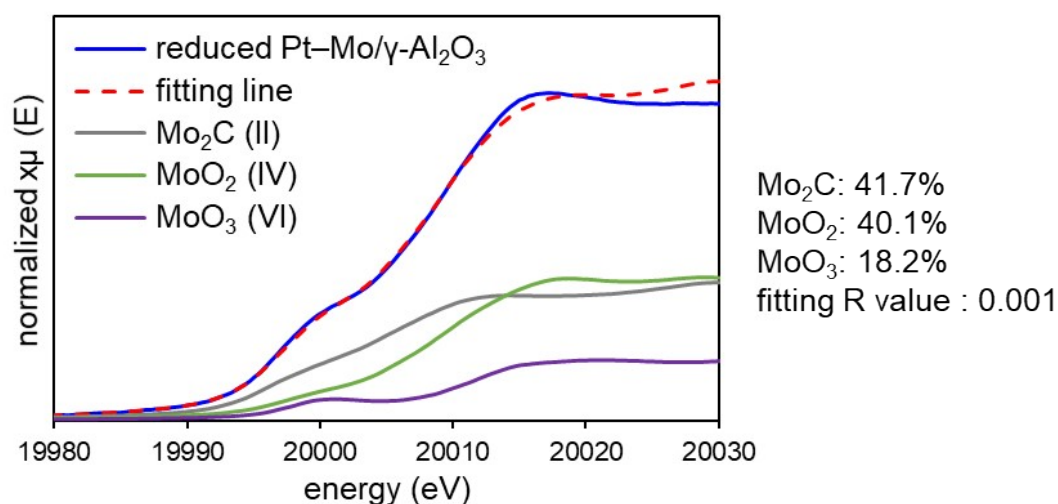

**Fig. S4** Liner combination fitting analysis of Mo K-edge XANES spectrum of reduced Pt–Mo/ $\gamma$ -Al<sub>2</sub>O<sub>3</sub>.

The time-course experiment was performed as shown in Fig. S5. If the reductive amination of **2a** with **1a** proceeds via *N*-acetylpiperidine (**4a**) or ethanol (**5a**), the yield of **4a** or **5a** should increase and then decrease as time passed. The yields of **4a** and **5a** did not show such result (Fig. S5b), which strongly supports a possibility of the reaction pathway via aldehyde.

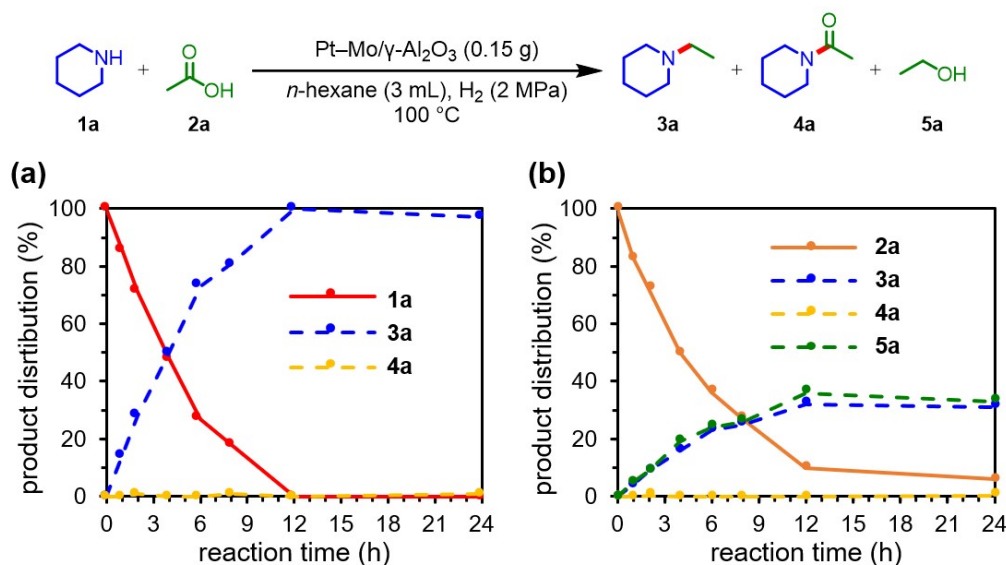

**Fig. S5** Time-course data of the Pt-Mo/ $\gamma$ -Al<sub>2</sub>O<sub>3</sub> catalyzed reductive amination of **2a** with **1a** to **3a**. Product distribution was determined based on (a) **1a** and (b) **2a**.

To discuss the acid properties of Pt-M/ $\gamma$ -Al<sub>2</sub>O<sub>3</sub> (M = Mo, Re, W, and V) and Pt/ $\gamma$ -Al<sub>2</sub>O<sub>3</sub>, we conducted pyridine FT-IR and NH<sub>3</sub>-TPD measurements. The pyridine FT-IR spectrum of Pt-Mo/ $\gamma$ -Al<sub>2</sub>O<sub>3</sub> showed a strong peak at 1448 cm<sup>-1</sup> assigned to a Lewis acid site (Fig. S6a),<sup>S13</sup> which is similar to that of Pt/ $\gamma$ -Al<sub>2</sub>O<sub>3</sub>. The NH<sub>3</sub>-TPD spectrum of Pt/ $\gamma$ -Al<sub>2</sub>O<sub>3</sub> exhibited two peaks at 161 and 292 °C, while all spectra of Pt-M/ $\gamma$ -Al<sub>2</sub>O<sub>3</sub> showed only one peak at 161 °C (Fig. S6b). Both pyridine FT-IR and NH<sub>3</sub>-TPD spectra did not show any additional peaks by M loading. Thus, we could not identify the acid nature of MoO<sub>x</sub> by pyridine FT-IR and NH<sub>3</sub>-TPD.

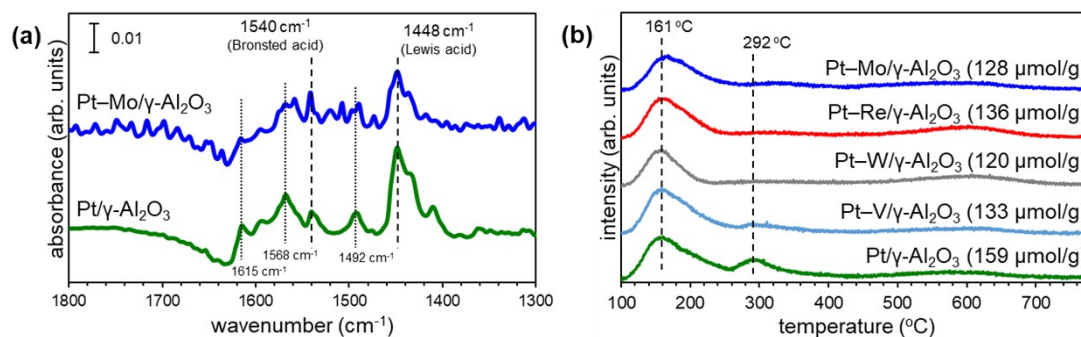

**Fig. S6** (a) *In situ* pyridine adsorption FT-IR analysis of Pt-Mo/ $\gamma$ -Al<sub>2</sub>O<sub>3</sub>, and Pt/ $\gamma$ -Al<sub>2</sub>O<sub>3</sub>, and (b) NH<sub>3</sub>-TPD profiles for Pt-M/ $\gamma$ -Al<sub>2</sub>O<sub>3</sub> (M = Mo, Re, W, or V) and Pt/ $\gamma$ -Al<sub>2</sub>O<sub>3</sub>. Acid amount is presented in parentheses.

As shown in Fig. S7a, a slab model is constructed assuming the oxygen-vacant (011) surface of MoO<sub>2</sub> that consist of [Mo(IV)<sub>4</sub>(H<sub>2</sub>O)<sub>4</sub>OH<sup>-</sup><sub>7</sub>O<sup>2-</sup><sub>6</sub>]<sup>3-</sup> (model **A**). Cartesian coordinate of the MoO<sub>2</sub> surface is taken from a result of neutron powder diffraction.<sup>S14</sup> In order to suppress a segmentation effect of the edge of the slab model, terminal oxygen ions (O<sup>2-</sup>) are capped by protons, and only the geometry of terminal protons is optimized. After that, to examine an adsorption of the **2a** on the surface, one **2a** is attached to the model **A** and only a structure of the **2a** molecule is optimized on the slab model as shown in Fig. S7b (model **B**). An isolated **2a** molecule is also optimized separately (model **C**).

The absorption energy ( $\Delta E$ ) is estimated by

$$\Delta E = \{E(\mathbf{A}) + E(\mathbf{C})\} - E(\mathbf{B}),$$

where  $E(\mathbf{A})$ ,  $E(\mathbf{B})$  and  $E(\mathbf{C})$  are calculated total energies of the models **A**, **B** and **C**, respectively.  $E(\mathbf{A})$ ,  $E(\mathbf{B})$ ,  $E(\mathbf{C})$  and  $\Delta E$  are summarized in the table below.

Calculated total energies of models **A**, **B** and **C**. Adsorption energy is also summarized in the same table.

| $E(\mathbf{B})$ / Hartree | $E(\mathbf{A})$ / Hartree | $E(\mathbf{C})$ / Hartree | $\Delta E$ / kcal mol <sup>-1</sup> |
|---------------------------|---------------------------|---------------------------|-------------------------------------|
| -1787.0328                | -1557.8821                | -229.07761                | 45.9                                |

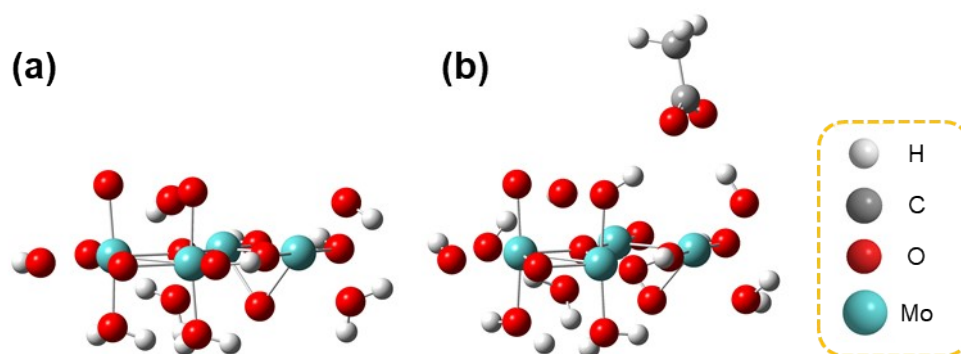

**Fig. S7** Illustration of (a) model **A** and (b) model **B**.

All calculations are performed under the gas phase condition by a spin unrestricted density functional theory (UDFT) with a use of Becke-3-parameter-Lee-Yang-Parr functional set. As basis set, 6-31G\* (C, O, H) and Lanl2dz (Mo) are used. The spin state of the model is considered to be an open-shell singlet state. Cartesian coordinate of models **B** and **C** are summarized in the table below.

Cartesian coordinate of models **B** and **C**. (The model **A** is a substructure of model **B**).

| Model <b>B</b> |          |          |          | Model <b>C</b> |           |           |           |
|----------------|----------|----------|----------|----------------|-----------|-----------|-----------|
| Atom           | x / Å    | y / Å    | z / Å    | Atom           | x / Å     | y / Å     | z / Å     |
| Mo             | -0.07918 | 20.52424 | -1.07663 | C              | -0.092462 | 0.125630  | -0.000180 |
| Mo             | -3.43470 | 20.50702 | -2.55746 | O              | -0.645667 | 1.201996  | 0.000034  |
| Mo             | -3.34533 | 20.70194 | -5.06101 | O              | -0.778748 | -1.046603 | -0.000025 |
| Mo             | 0.11567  | 20.61309 | -3.58020 | H              | -1.723776 | -0.802819 | 0.000368  |
| O              | -0.04661 | 19.04102 | -2.39986 | C              | 1.397605  | -0.109871 | -0.000034 |
| O              | -3.47156 | 22.48491 | -2.39908 | H              | 1.685643  | -0.687150 | 0.884849  |
| O              | -4.91800 | 20.54806 | -3.88034 | H              | 1.685026  | -0.696052 | -0.879203 |
| O              | -1.86202 | 20.66090 | -3.73813 | H              | 1.917564  | 0.848319  | -0.004808 |
| O              | -2.04858 | 20.57750 | -1.01510 |                |           |           |           |
| O              | -3.38775 | 22.67162 | -5.12209 |                |           |           |           |
| O              | 1.89851  | 20.47644 | -0.91871 |                |           |           |           |
| O              | -4.79063 | 20.57134 | -0.99439 |                |           |           |           |
| O              | -1.98939 | 20.63762 | -6.62408 |                |           |           |           |
| O              | -4.73145 | 20.63146 | -6.60337 |                |           |           |           |
| O              | 2.08506  | 20.55983 | -3.64174 |                |           |           |           |
| O              | -0.00071 | 21.90960 | 0.46602  |                |           |           |           |
| O              | 0.05847  | 21.96972 | -5.14295 |                |           |           |           |
| H              | 0.02328  | 22.70807 | -0.08816 |                |           |           |           |
| H              | 0.86694  | 21.82703 | -5.66795 |                |           |           |           |
| H              | 2.27131  | 20.37701 | -1.82275 |                |           |           |           |
| H              | 2.40687  | 20.20771 | -4.49412 |                |           |           |           |
| H              | -4.13323 | 20.84519 | -0.33069 |                |           |           |           |
| H              | -4.12136 | 20.99445 | -7.27071 |                |           |           |           |
| H              | -1.32216 | 21.30192 | -6.31141 |                |           |           |           |
| O              | -3.30847 | 18.72405 | -5.21939 |                |           |           |           |
| O              | -0.02199 | 19.16761 | 0.48612  |                |           |           |           |
| O              | 0.03720  | 19.22773 | -5.12286 |                |           |           |           |
| O              | -3.39228 | 18.53734 | -2.49638 |                |           |           |           |
| H              | 0.94338  | 18.95546 | 0.54221  |                |           |           |           |
| H              | -0.44340 | 18.46275 | -4.73676 |                |           |           |           |
| H              | -2.83179 | 17.99941 | -3.19538 |                |           |           |           |

|   |          |          |          |
|---|----------|----------|----------|
| H | -2.96476 | 18.64399 | -6.13492 |
| H | -0.16988 | 19.74839 | 1.27328  |
| H | -0.58897 | 19.62730 | -5.80574 |
| H | -2.63488 | 18.04522 | -4.65449 |
| H | -2.84478 | 18.44101 | -1.68056 |
| C | -1.07128 | 24.96832 | -0.85743 |
| O | 0.05591  | 24.40569 | -0.79838 |
| O | -2.22116 | 24.47868 | -0.74625 |
| H | -2.91559 | 22.96489 | -1.73656 |
| C | -1.03413 | 26.50742 | -1.14036 |
| H | -1.23297 | 26.67400 | -2.20784 |
| H | -1.82283 | 27.02473 | -0.57744 |
| H | -0.05491 | 26.94176 | -0.89957 |

---

## 5. Supplementary schemes

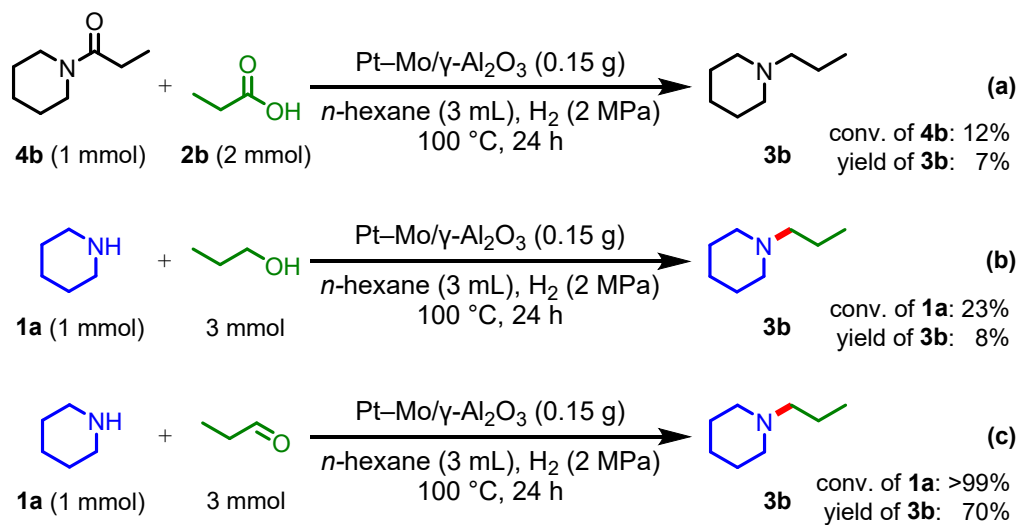

**Scheme S1** Control experiments. (a) Hydrogenation of **4b**. (b) Amination of 1-propanol with **1a**. (c) Reductive amination of propionaldehyde with **1a**.

A major reaction pathway is proposed as shown in Scheme S2. First, Pt NPs are formed via reduction with  $H_2$  and dissociate  $H_2$  to reduce  $MoO_3$  to  $MoO_x$  (step I). Then, hydrogen species are formed on the Pt NPs (step II). Carboxylic acid is adsorbed on the  $MoO_x$  (step III). Activated carboxylic acid is hydrogenated to aldehyde (step IV) followed by the attack of amine to the activated aldehyde to form hemiaminal intermediate (step V). Finally, hydrogenation of hemiaminal affords alkylamine (step VI). The steps VIa and VIb in Scheme S2 was supported by the following experimental results: the amination of acetic acid- $d_4$  (**21**) afforded *N*-ethyl piperidine with H–D scrambling (Scheme 3a). Thus, there are two reaction pathways to afford amine, i.e., via a direct hydrogenation of hemiaminal (step VIa) or through enamine (step VIb).

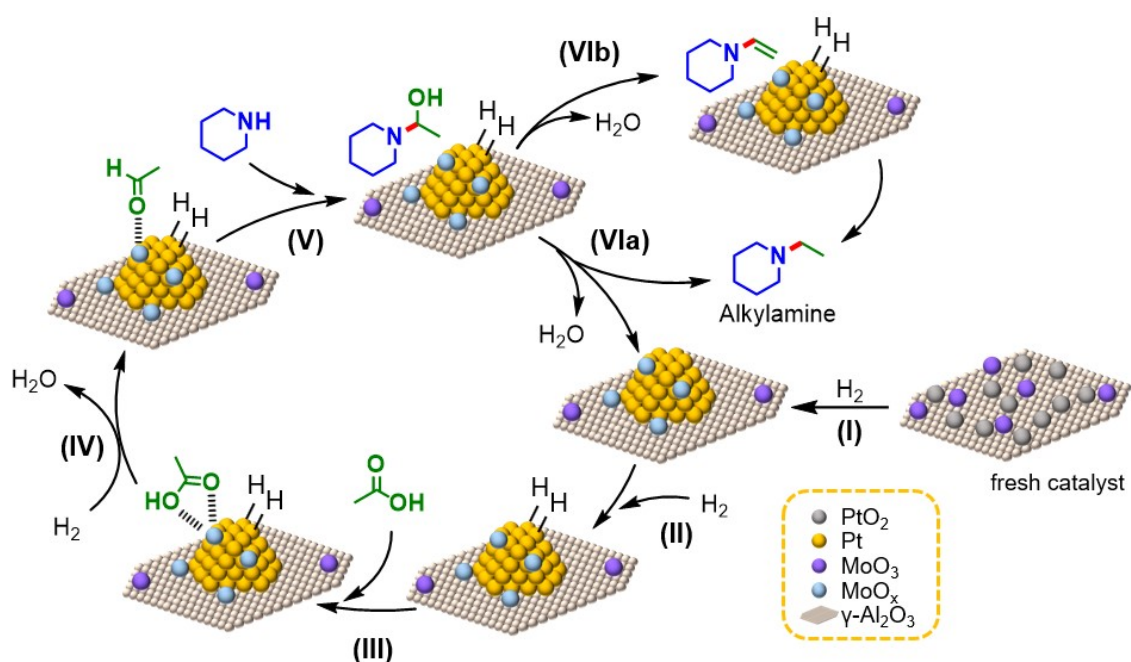

**Scheme S2** Proposed major reaction path for the reductive amination of **2a** with **1a** over a Pt–Mo/ $\gamma$ - $Al_2O_3$ .

## 6. Product identification

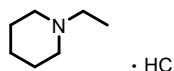

### ***N*-ethyl piperidine hydrochloride**

CAS registry No. [17874-60-1]. **<sup>1</sup>H NMR** (400 MHz, D<sub>2</sub>O): δ/ppm 3.52 (d, 2H, *J* = 12.4 Hz), 3.14 (dq, 2H, *J* = 7.2, 2.4 Hz), 2.90 (t, 2H, *J* = 12.4 Hz), 1.95 (d, 2H, *J* = 14.0 Hz), 1.86–1.78 (m, 1H), 1.78–1.63 (m, 2H), 1.54–1.41 (m, 1H), 1.30 (dt, 3H, *J* = 7.4 Hz, 3.2 Hz). **<sup>13</sup>C NMR** (100 MHz, D<sub>2</sub>O): δ/ppm 53.1, 52.7, 23.5, 21.8, 9.2. **GC-MS** (EI): 113.10.

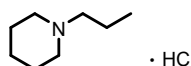

### ***N*-propyl piperidine hydrochloride**

CAS registry No. [17874-62-3]. **<sup>1</sup>H NMR** (400 MHz, D<sub>2</sub>O): δ/ppm 3.52 (d, 2H, *J* = 12.4 Hz), 3.12–2.96 (m, 2H), 2.91 (dt, 2H, *J* = 12.4, 1.6 Hz), 1.94 (d, 2H, *J* = 14.4 Hz), 1.87–1.64 (m, 5H), 1.55–1.41 (m, 1H), 0.96 (t, 3H, *J* = 7.4 Hz). **<sup>13</sup>C NMR** (100 MHz, D<sub>2</sub>O): δ/ppm 59.0, 53.6, 23.4, 21.8, 17.7, 10.8. **GC-MS** (EI): 127.15.

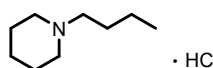

### ***N*-butyl piperidine hydrochloride**

CAS registry No. [80840-88-6]. **<sup>1</sup>H NMR** (400 MHz, D<sub>2</sub>O): δ/ppm 3.53 (d, 2H, *J* = 12.8 Hz), 3.12–3.04 (m, 2H), 2.91 (dt, 2H, *J* = 12.8, 2.0 Hz), 1.94 (d, 2H, *J* = 14.4 Hz), 1.86–1.64 (m, 5H), 1.54–1.30 (m, 3H), 0.93 (t, 3H, *J* = 7.4 Hz). **<sup>13</sup>C NMR** (100 MHz, D<sub>2</sub>O): δ/ppm 57.3, 53.6, 26.0, 23.4, 21.8, 19.9, 13.4. **GC-MS** (EI): 141.15.

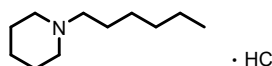

### ***N*-hexyl piperidine hydrochloride**

CAS registry No. [80840-90-0]. **<sup>1</sup>H NMR** (400 MHz, D<sub>2</sub>O): δ/ppm 3.52 (d, 2H, *J* = 12.4 Hz), 3.13–3.03 (m, 2H), 2.91 (dt, 2H, *J* = 12.6, 2.0 Hz), 1.94 (d, 2H, *J* = 14.4 Hz), 1.86–1.65 (m, 5H), 1.53–1.41 (m, 1H), 1.40–1.25 (m, 6H), 0.88 (t, 3H, *J* = 7.2 Hz). **<sup>13</sup>C NMR** (100 MHz, D<sub>2</sub>O): δ/ppm 57.6, 53.6, 31.0, 26.0, 23.9, 23.4, 22.3, 21.8, 13.9. **GC-MS** (EI): 169.20.

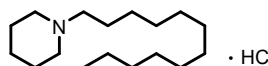

### ***N*-dodecyl piperidine hydrochloride**

CAS registry No. [71756-81-5]. **<sup>1</sup>H NMR** (400 MHz, CDCl<sub>3</sub>): δ/ppm 11.9 (br-s, 1H), 3.52 (d, 2H, *J* = 11.2 Hz), 2.99–2.87 (m, 2H), 2.76–2.60 (m, 2H), 2.38–2.20 (m, 2H), 2.00–1.79 (m, 5H), 1.52–1.18 (m, 19H), 0.88 (t, 3H, *J* = 6.8 Hz). **<sup>13</sup>C NMR** (100 MHz, CDCl<sub>3</sub>): δ/ppm 57.4, 53.0, 31.8, 29.50, 29.48, 29.40, 29.3, 29.2, 29.0, 26.8, 23.4, 22.6, 22.5, 22.1, 14.0. **GC-MS** (EI): 253.25.



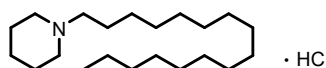

**N-hexadecyl piperidine hydrochloride**

CAS registry No. [89632-30-4]. <sup>1</sup>H NMR (400 MHz, CDCl<sub>3</sub>): δ/ppm 11.8 (br-s, 1H), 3.53 (d, 2H, *J* = 10.8 Hz), 3.02–2.83 (m, 2H), 2.75–2.58 (m, 2H), 2.40–2.13 (m, 2H), 2.00–1.78 (m, 4H), 1.50–1.05 (m, 28H), 0.88 (t, 3H, *J* = 7.0 Hz). <sup>13</sup>C NMR (100 MHz, CDCl<sub>3</sub>): δ/ppm 57.5, 53.0, 31.8, 29.63, 29.60, 29.57, 29.50, 29.4, 29.33, 29.28, 29.0, 26.8, 23.4, 22.6, 22.5, 22.1, 14.1. GC-MS (EI): 309.30.

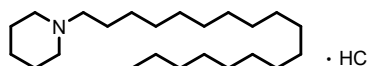

**N-octadecyl piperidine hydrochloride**

CAS registry No. [89632-31-5]. <sup>1</sup>H NMR (400 MHz, CDCl<sub>3</sub>): δ/ppm 11.9 (br-s, 1H), 3.51 (d, 2H, *J* = 10.4 Hz), 3.00–2.85 (m, 2H), 2.75–2.59 (m, 2H), 2.40–2.23 (m, 2H), 2.00–1.78 (m, 4H), 1.55–1.00 (m, 32H), 0.88 (t, 3H, *J* = 7.0 Hz). <sup>13</sup>C NMR (100 MHz, CDCl<sub>3</sub>): δ/ppm 57.5, 53.0, 31.9, 29.63, 29.59, 29.5, 29.4, 29.33, 29.29, 29.0, 26.9, 23.4, 22.6, 22.5, 22.1, 14.1. GC-MS (EI): 337.40.

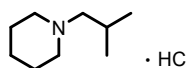

**N-isobutyl piperidine hydrochloride**

CAS registry No. [858850-36-9]. <sup>1</sup>H NMR (400 MHz, D<sub>2</sub>O): δ/ppm 3.53 (d, 2H, *J* = 12.0 Hz), 3.00–2.87 (m, 4H), 2.21–2.09 (m, 1H), 1.99–1.88 (m, 2H), 1.86–1.69 (m, 3H), 1.56–1.42 (m, 1H), 0.99 (d, 6H, *J* = 7.2 Hz). <sup>13</sup>C NMR (100 MHz, D<sub>2</sub>O): δ/ppm 64.5, 54.0, 23.7, 23.0, 21.7, 19.9. GC-MS (EI): 141.15.

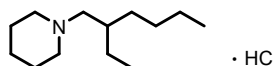

**N-(2-ethylhexyl) piperidine hydrochloride**

CAS registry No. [1071548-49-6]. <sup>1</sup>H NMR (400 MHz, D<sub>2</sub>O): δ/ppm 3.57–3.47 (m, 2H), 3.02 (d, 2H, *J* = 7.2 Hz), 2.99–2.86 (m, 2H), 1.93 (d, 2H, *J* = 14.4 Hz), 1.88–1.67 (m, 4H), 1.58–1.22 (m, 9H), 0.99–0.80 (m, 6H). <sup>13</sup>C NMR (100 MHz, D<sub>2</sub>O): δ/ppm 61.5, 54.4, 54.0, 34.2, 30.3, 28.1, 23.8, 22.9, 22.8, 21.7, 13.9, 9.9. GC-MS (EI): 197.20.

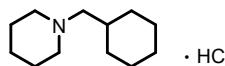

**N-cyclohexylmethyl piperidine hydrochloride**

CAS registry No. [5005-71-0]. <sup>1</sup>H NMR (400 MHz, D<sub>2</sub>O): δ/ppm 3.52 (d, 2H, *J* = 12.4 Hz), 3.02–2.82 (m, 4H), 2.01–1.60 (m, 11H), 1.56–1.41 (m, 1H), 1.38–1.11 (m, 3H), 1.09–0.94 (m, 2H). <sup>13</sup>C NMR (100 MHz, D<sub>2</sub>O): δ/ppm 63.4, 54.0, 32.7, 30.6, 26.0, 25.5, 23.0, 21.7. GC-MS (EI): 181.20.

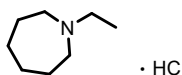

***N*-ethyl hexamethyleneimine hydrochloride**

CAS registry No. [6763-92-4]. **<sup>1</sup>H NMR** (400 MHz, D<sub>2</sub>O): δ/ppm 3.50–3.39 (m, 2H), 3.28–3.12 (m, 4H), 2.00–1.89 (m, 2H), 1.89–1.76 (m, 2H), 1.76–1.62 (m, 4H), 1.31 (t, 3H, *J* = 7.2 Hz). **<sup>13</sup>C NMR** (100 MHz, D<sub>2</sub>O): δ/ppm 54.7, 53.2, 26.3, 24.1, 9.6. **GC-MS** (EI): 127.20.

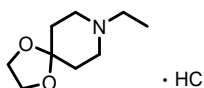

***N*-ethyl 4-piperidone ethylene ketal hydrochloride**

**<sup>1</sup>H NMR** (400 MHz, D<sub>2</sub>O): δ/ppm 4.08 (s, 4H), 3.67–3.60 (m, 2H), 3.28–3.09 (m, 4H), 2.14–1.98 (m, 4H), 1.33 (t, 3H, *J* = 7.4 Hz). **<sup>13</sup>C NMR** (100 MHz, D<sub>2</sub>O): δ/ppm 104.8, 65.2, 65.1, 52.2, 50.7, 32.1, 9.5. **GC-MS** (EI): 171.15.

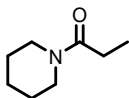

***N*-propionylpiperidine**

CAS registry No. [14045-28-4]. **<sup>1</sup>H NMR** (400 MHz, CDCl<sub>3</sub>): δ/ppm 3.55 (t, 2H, *J* = 5.6 Hz), 3.40 (t, 2H, *J* = 5.6 Hz), 2.34 (q, 2H, *J* = 7.6 Hz), 1.68–1.60 (m, 2H), 1.60–1.49 (m, 4H), 1.14 (t, 3H, *J* = 7.6 Hz). **<sup>13</sup>C NMR** (100 MHz, CDCl<sub>3</sub>): δ/ppm 172.0, 46.4, 42.5, 26.5, 26.4, 25.5, 24.5, 9.5. **GC-MS** (EI): 141.15.

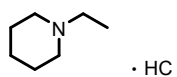

### *N*-ethyl piperidine hydrochloride

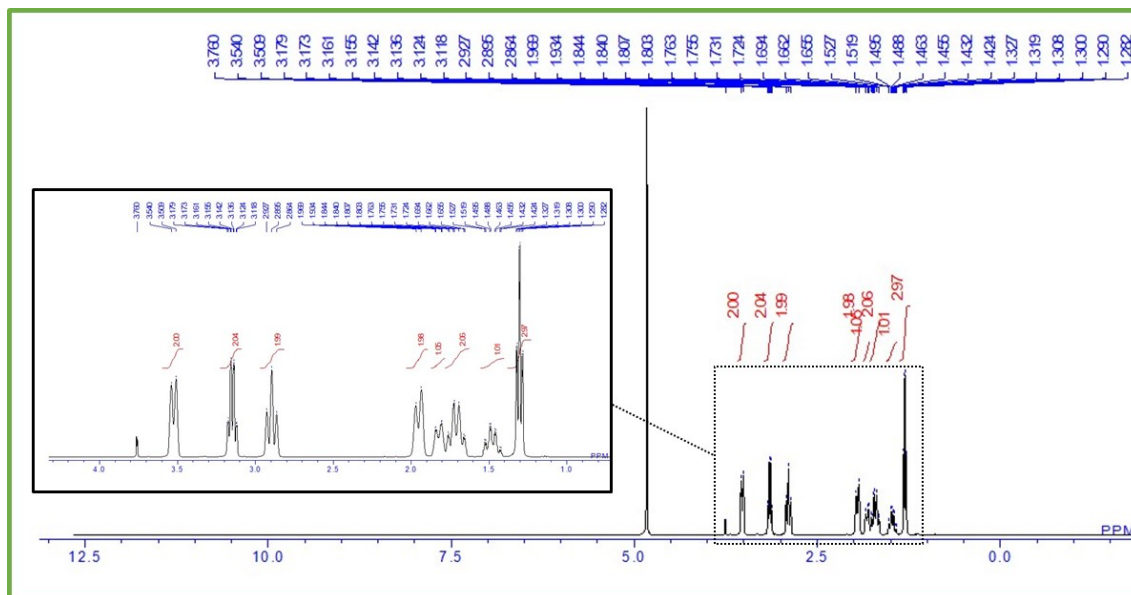

<sup>1</sup>H NMR spectrum of *N*-ethyl piperidine hydrochloride

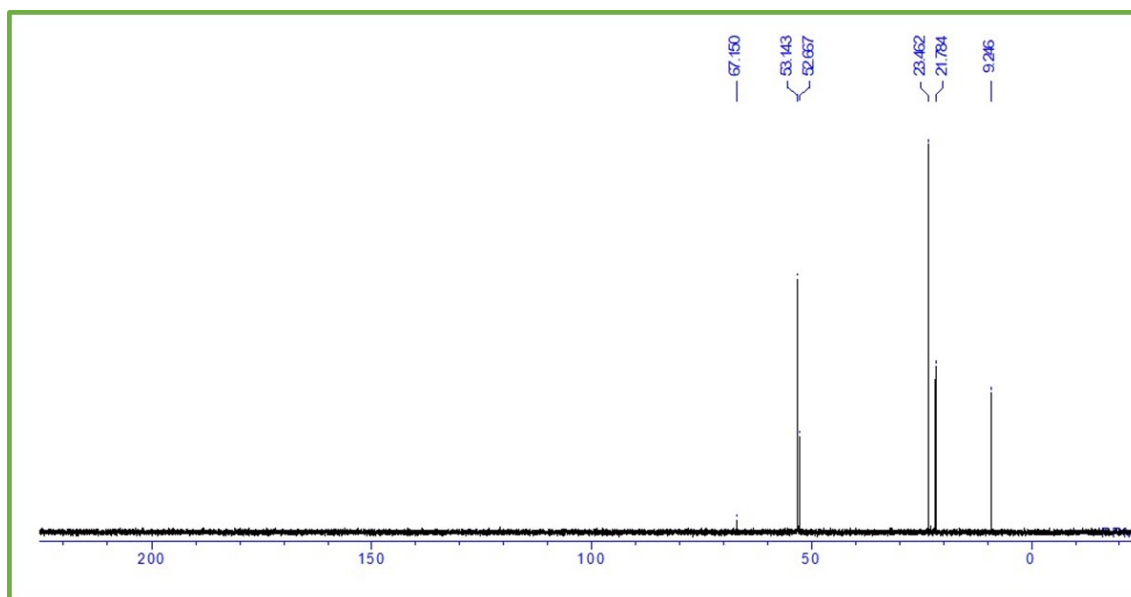

<sup>13</sup>C NMR spectrum of *N*-ethyl piperidine hydrochloride

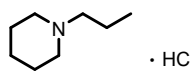

***N*-propyl piperidine hydrochloride**

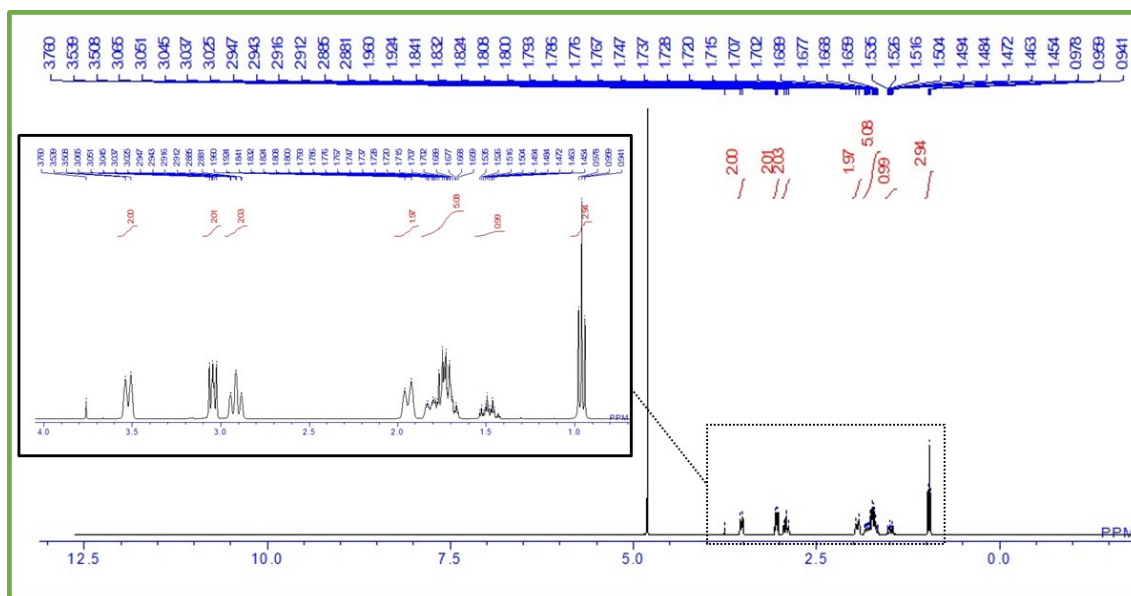

<sup>1</sup>H NMR spectrum of *N*-propyl piperidine hydrochloride

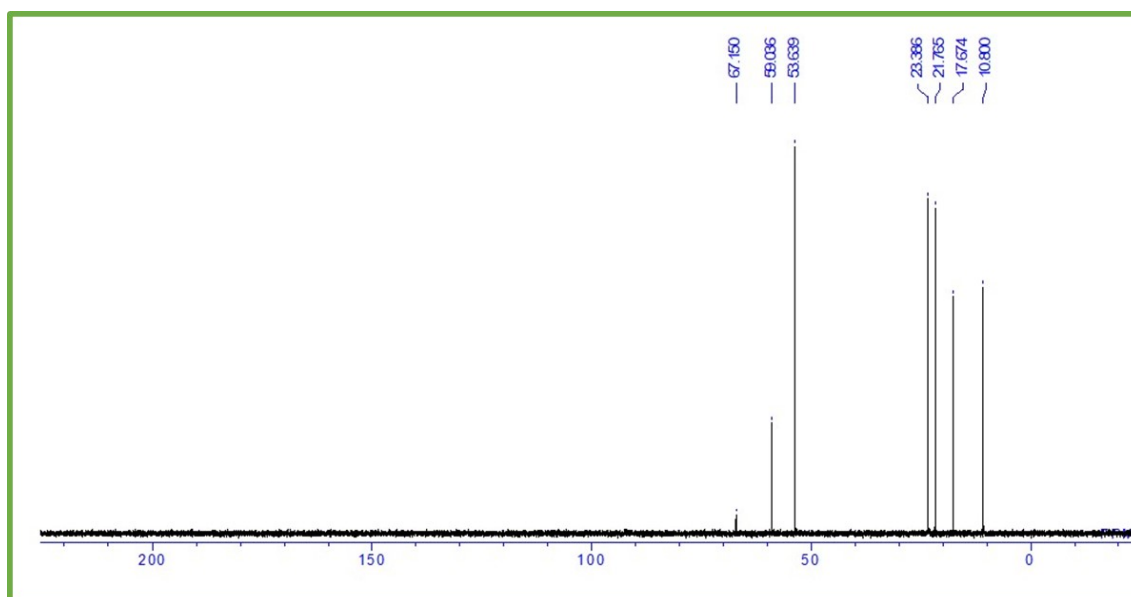

<sup>13</sup>C NMR spectrum of *N*-propyl piperidine hydrochloride

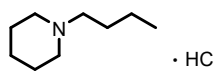

***N*-butyl piperidine hydrochloride**

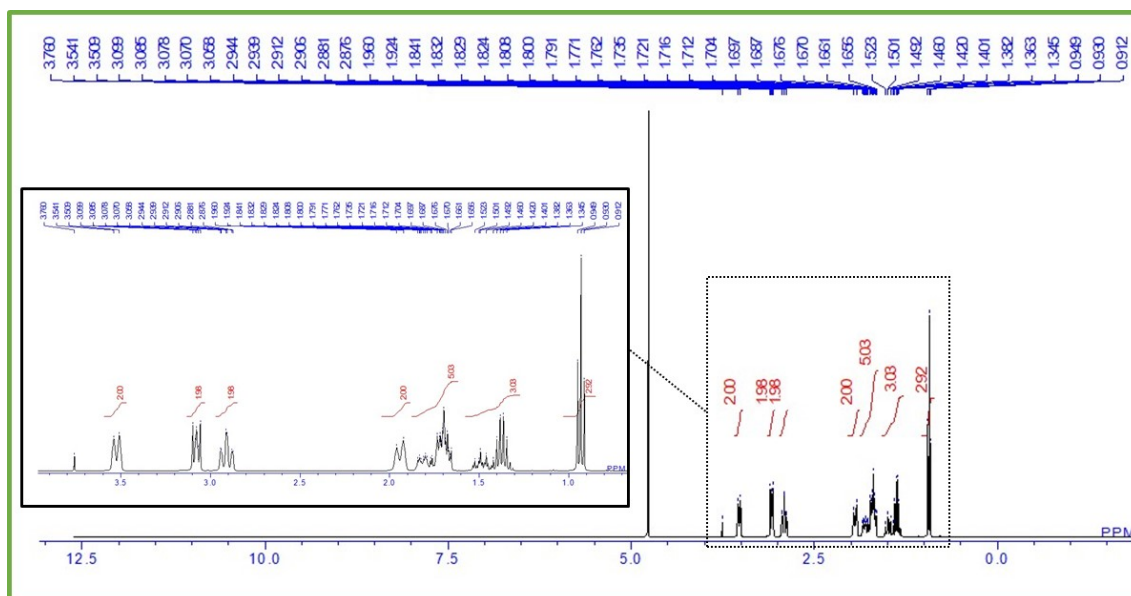

<sup>1</sup>H NMR spectrum of *N*-butyl piperidine hydrochloride

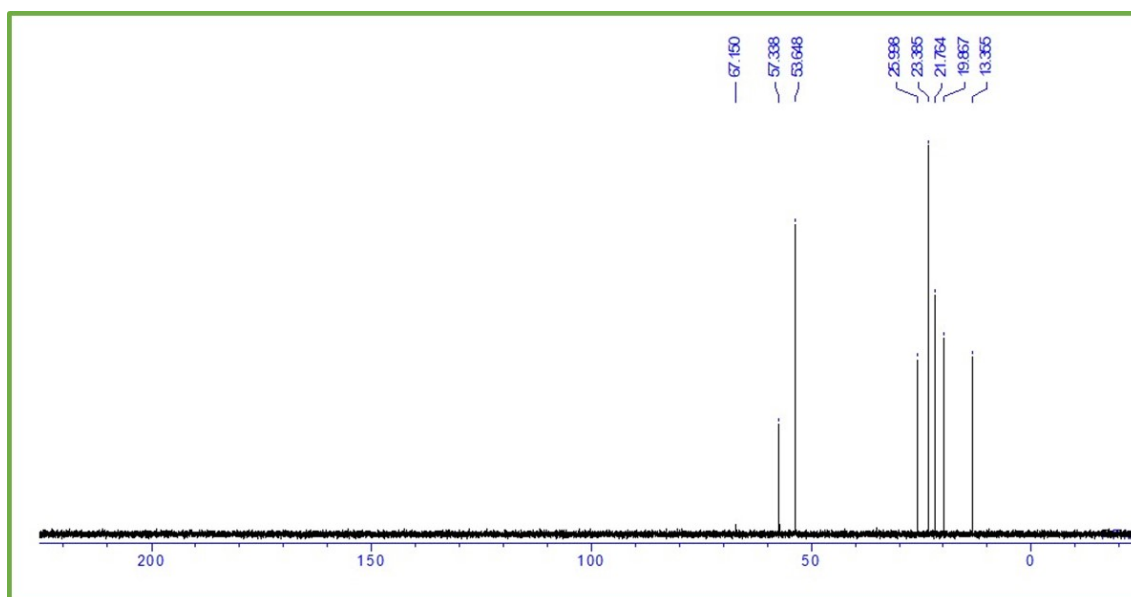

<sup>13</sup>C NMR spectrum of *N*-butyl piperidine hydrochloride

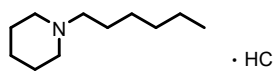

***N*-hexyl piperidine hydrochloride**

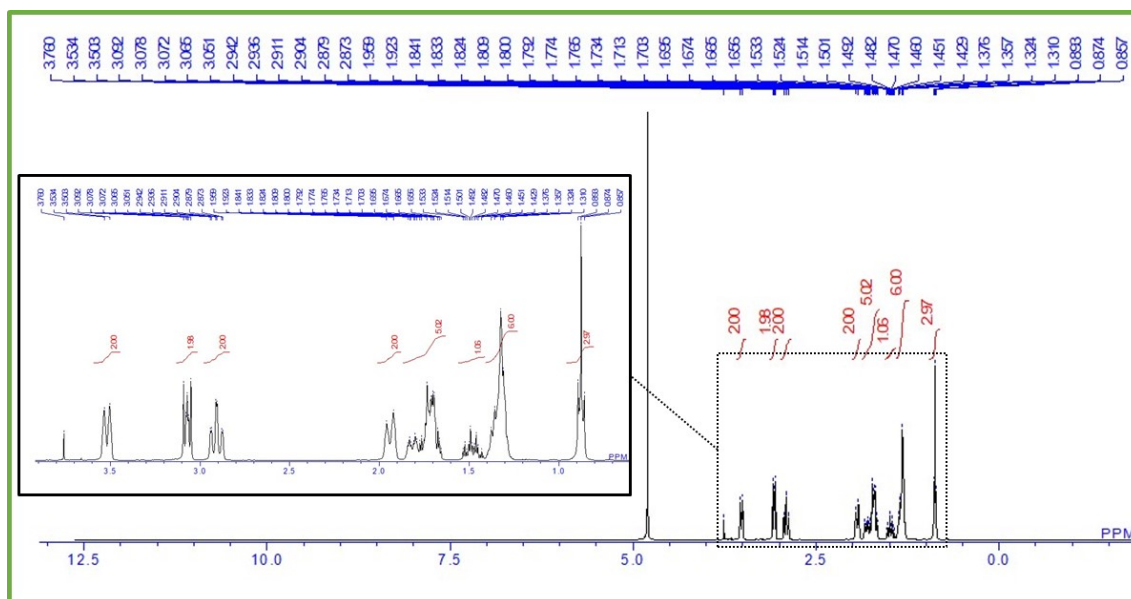

<sup>1</sup>H NMR spectrum of *N*-hexyl piperidine hydrochloride

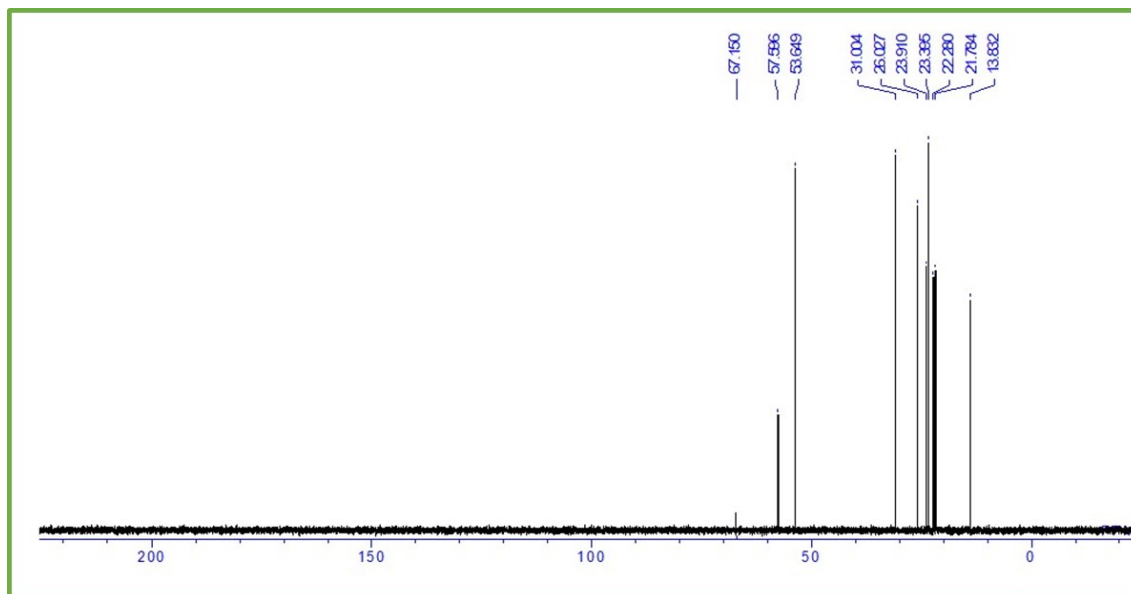

<sup>13</sup>C NMR spectrum of *N*-hexyl piperidine hydrochloride

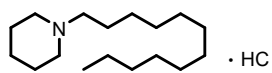

***N*-dodecyl piperidine hydrochloride**

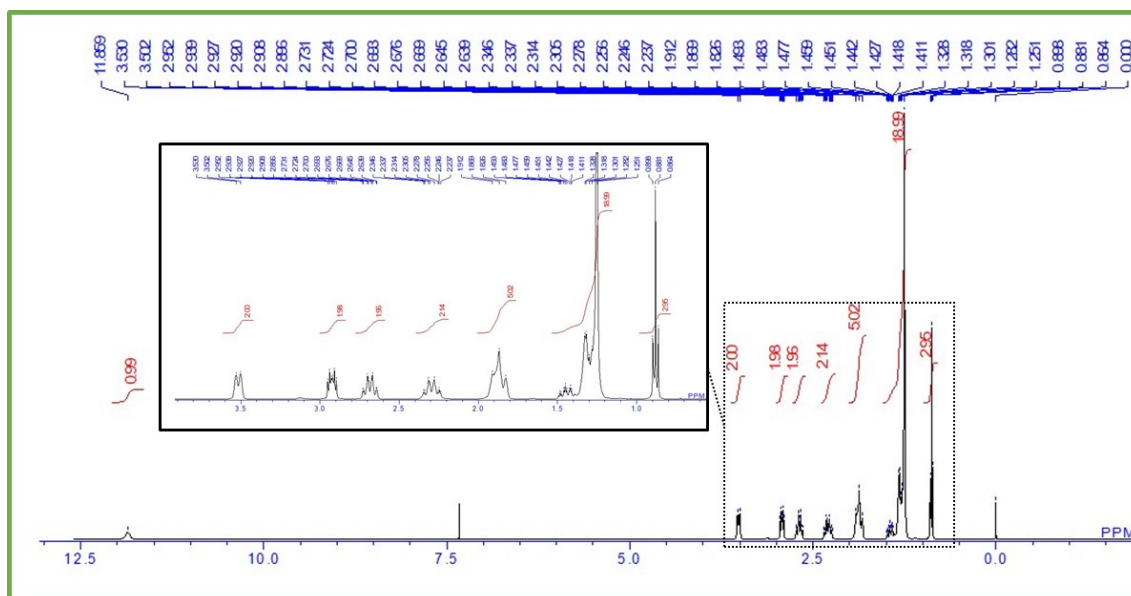

<sup>1</sup>H NMR spectrum of *N*-dodecyl piperidine hydrochloride

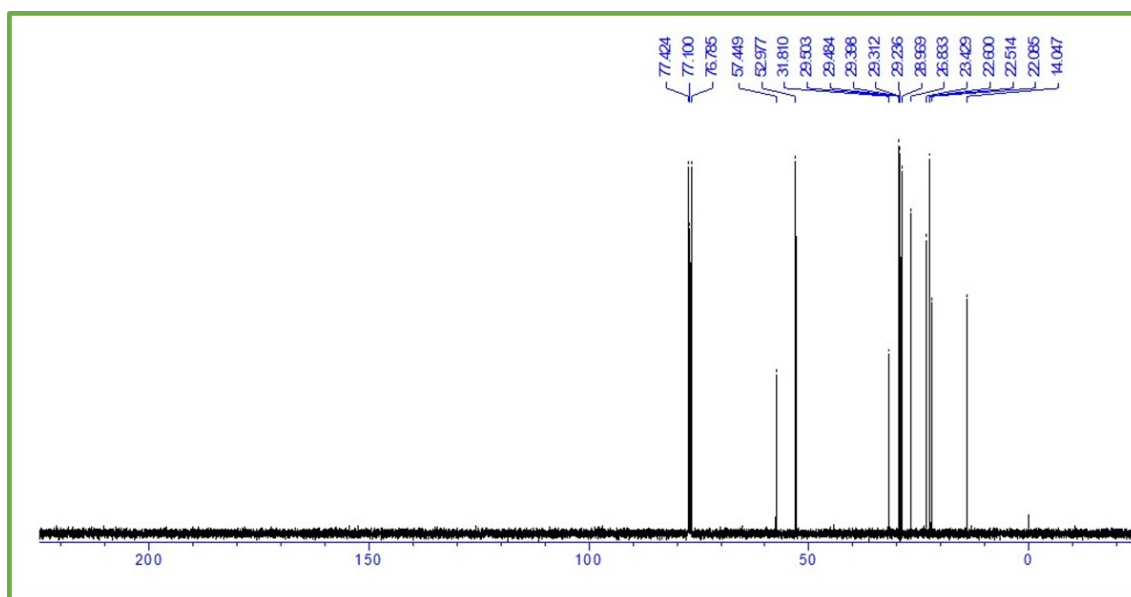

<sup>13</sup>C NMR spectrum of *N*-dodecyl piperidine hydrochloride

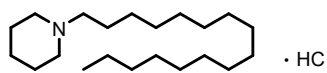

***N*-hexadecyl piperidine hydrochloride**

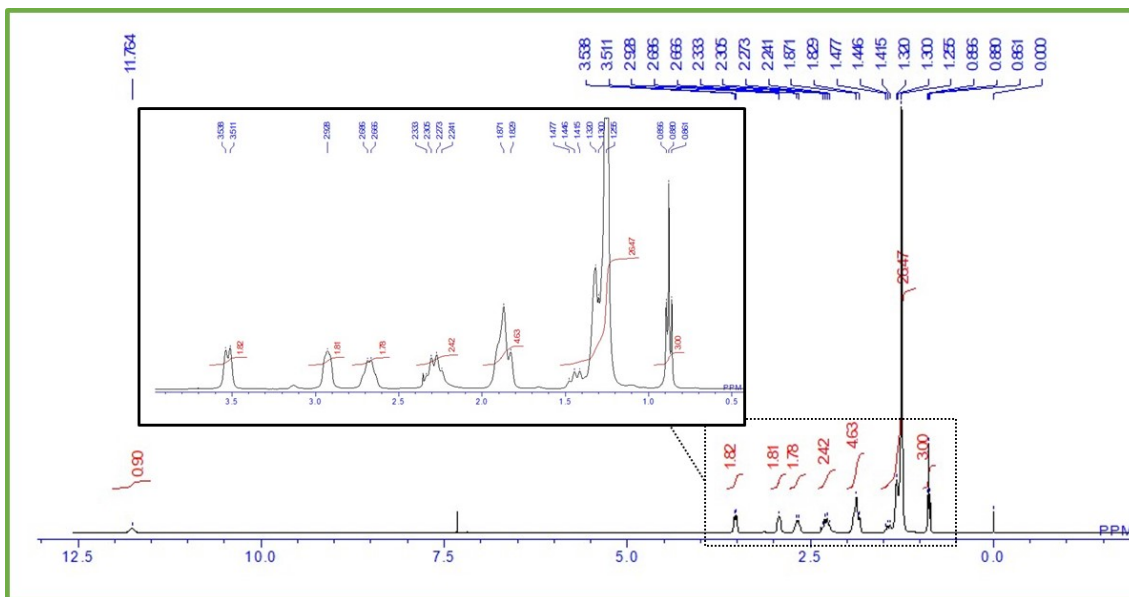

<sup>1</sup>H NMR spectrum of *N*-hexadecyl piperidine hydrochloride

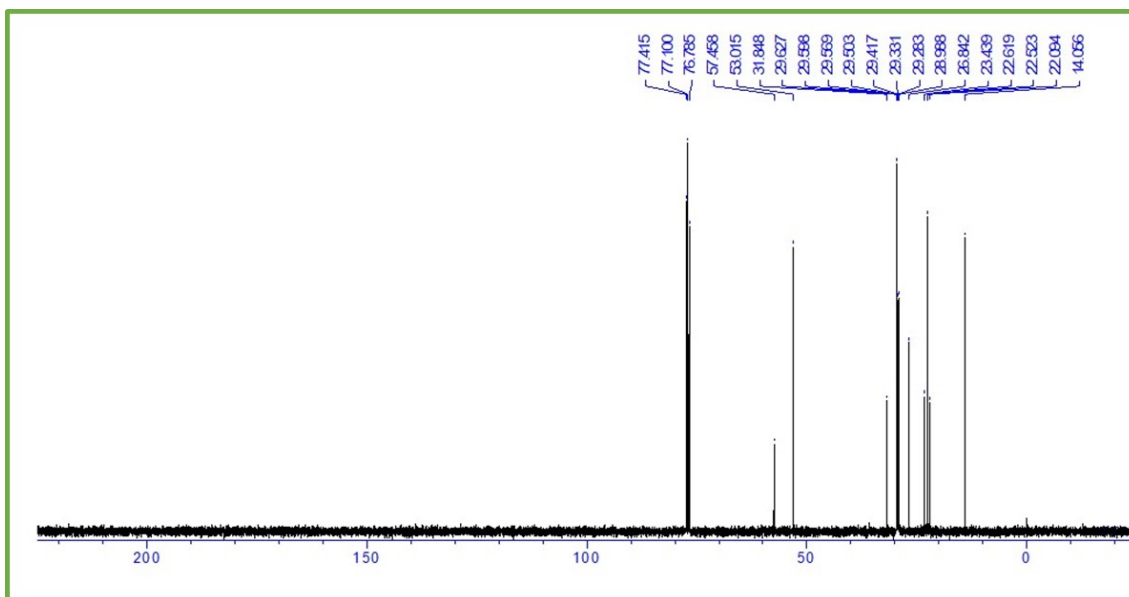

<sup>13</sup>C NMR spectrum of *N*-hexadecyl piperidine hydrochloride



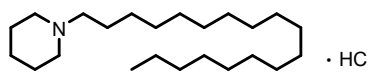

*N*-octadecyl piperidine hydrochloride

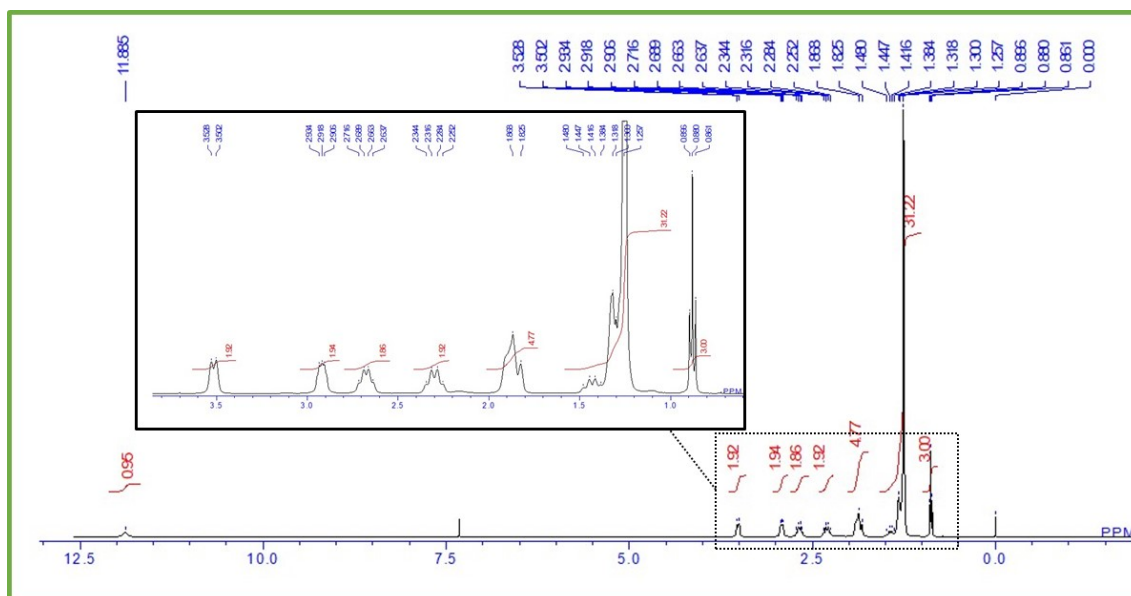

$^1\text{H}$  NMR spectrum of *N*-octadecyl piperidine hydrochloride

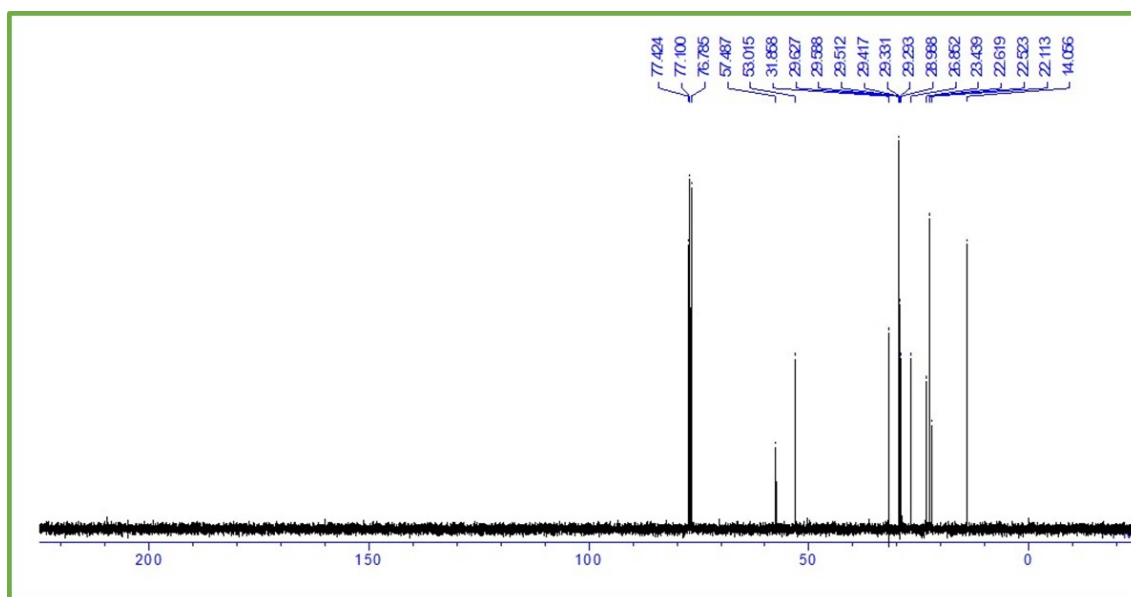

$^{13}\text{C}$  NMR spectrum of *N*-octadecyl piperidine hydrochloride

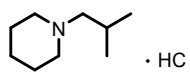

### *N*-isobutyl piperidine hydrochloride

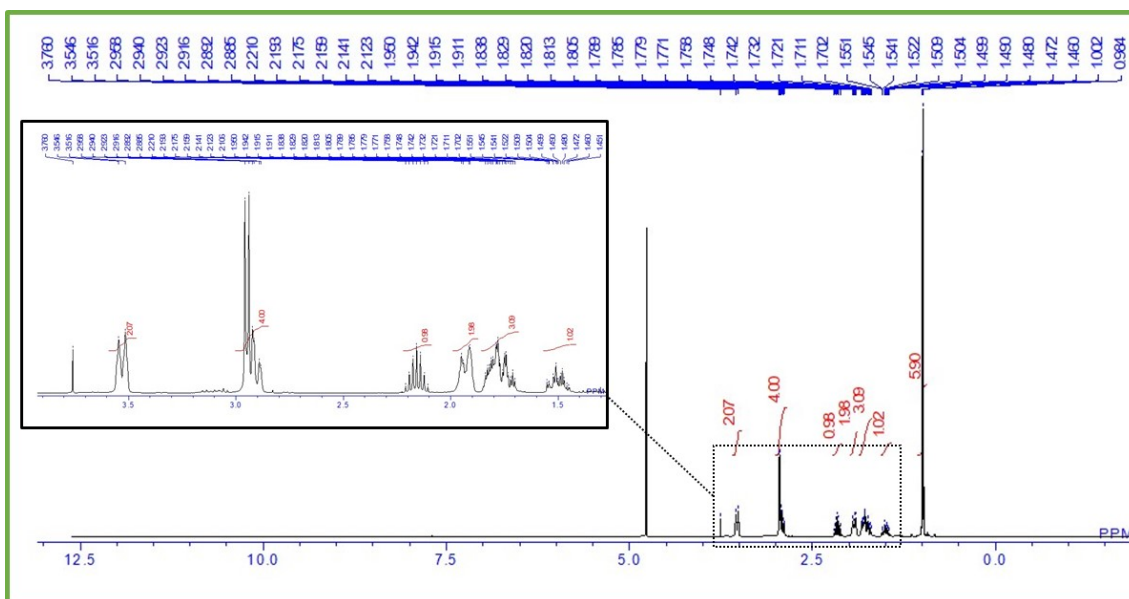

<sup>1</sup>H NMR spectrum of *N*-isobutyl piperidine hydrochloride

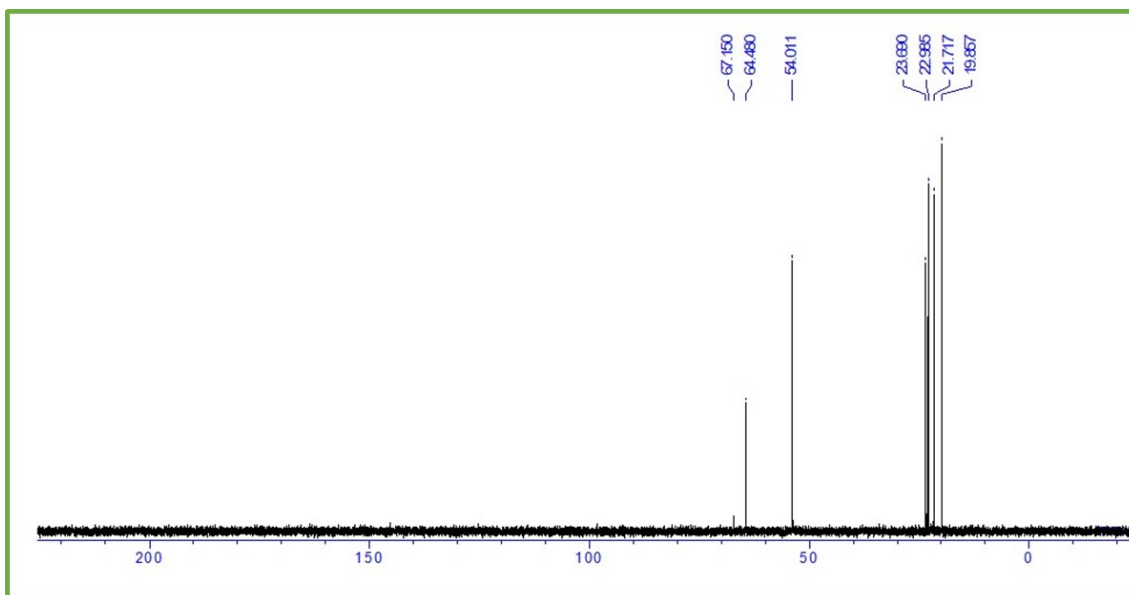

<sup>13</sup>C NMR spectrum of *N*-isobutyl piperidine hydrochloride

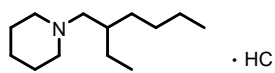

***N*-(2-ethylhexyl) piperidine hydrochloride**

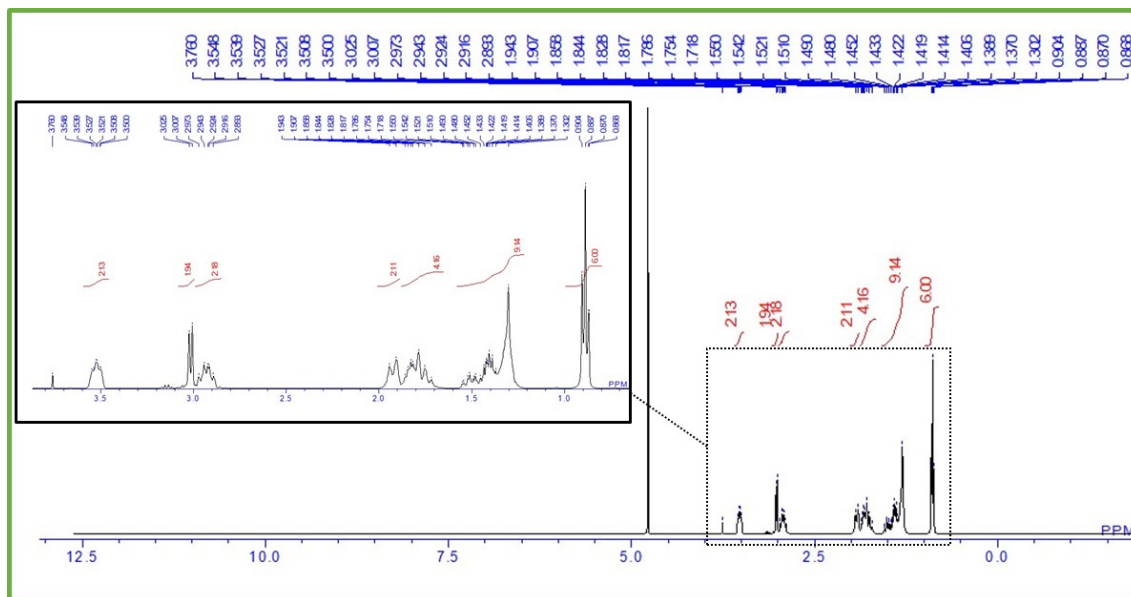

<sup>1</sup>H NMR spectrum of *N*-(2-ethylhexyl) piperidine hydrochloride

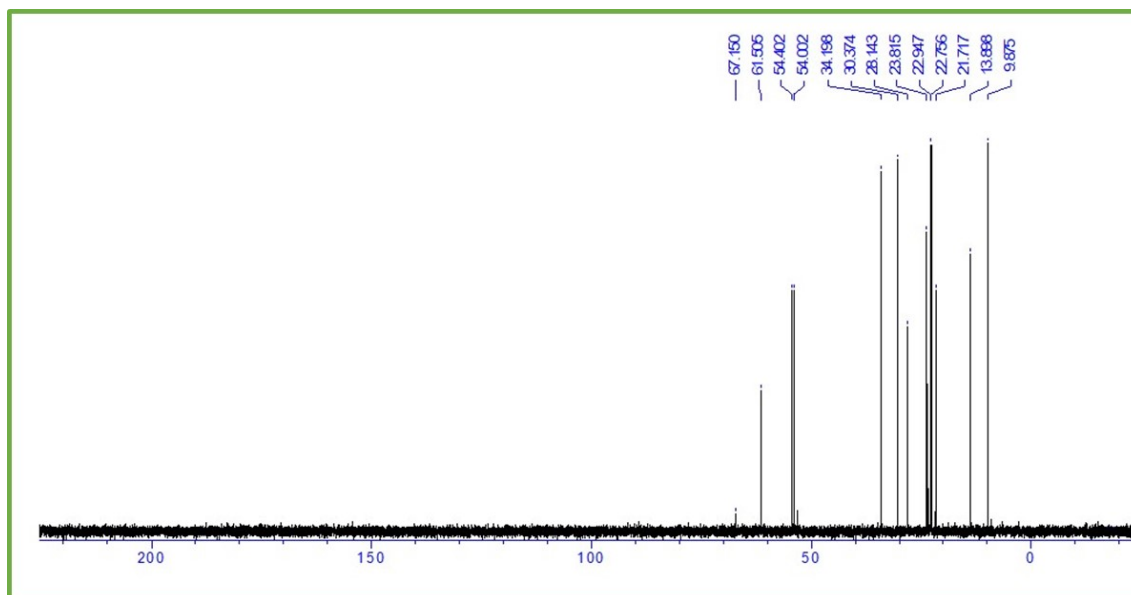

<sup>13</sup>C NMR spectrum of *N*-(2-ethylhexyl) piperidine hydrochloride

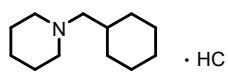

***N*-cyclohexylmethyl piperidine hydrochloride**

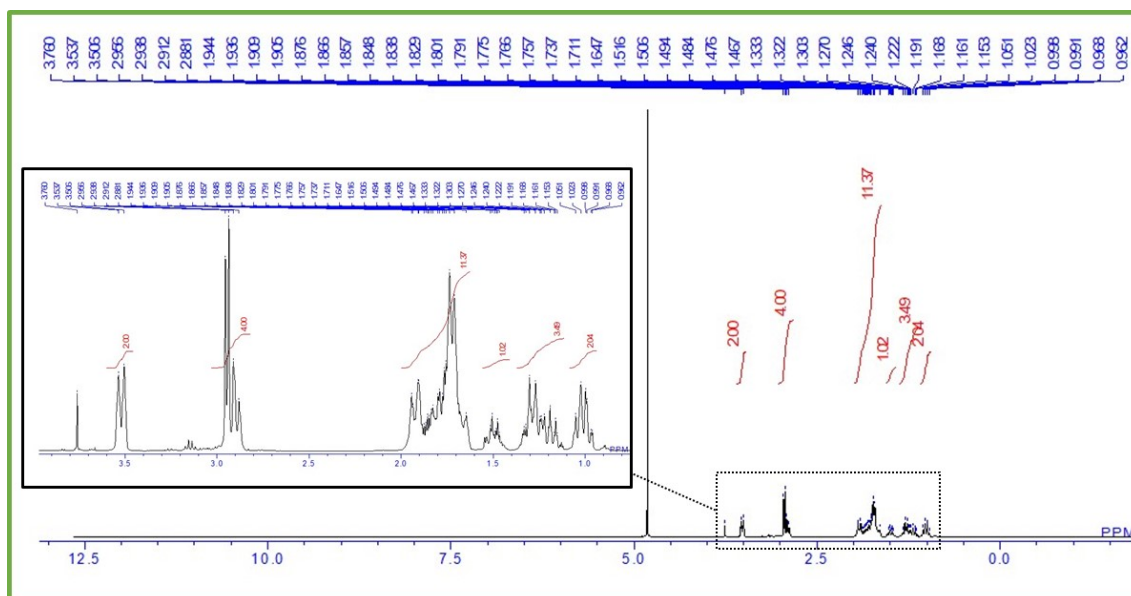

<sup>1</sup>H NMR spectrum of *N*-cyclohexylmethyl piperidine hydrochloride

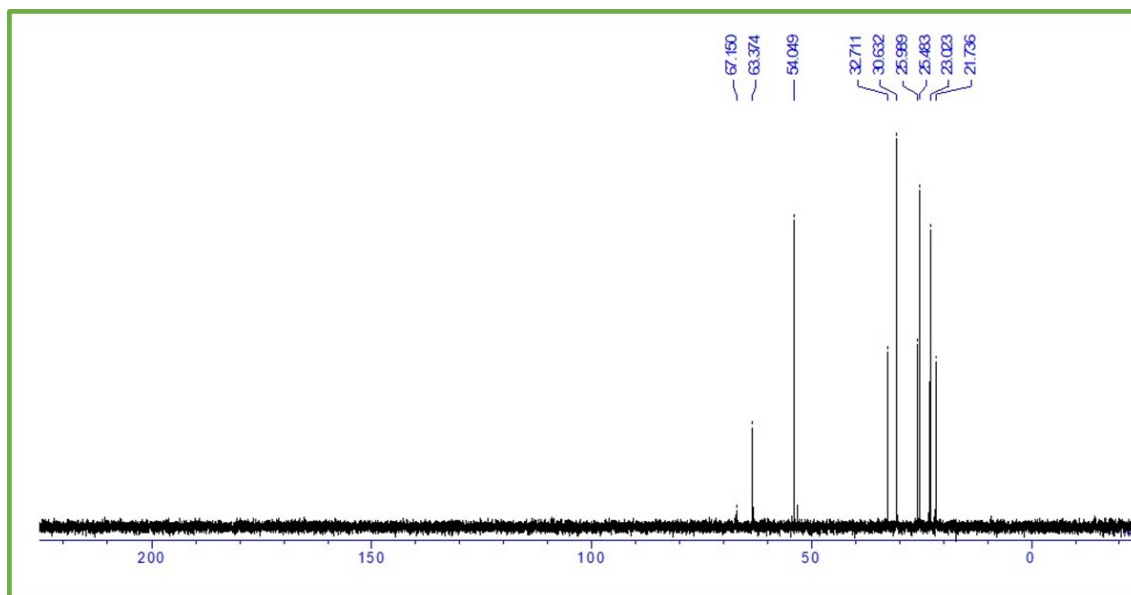

<sup>13</sup>C NMR spectrum of *N*-cyclohexylmethyl piperidine hydrochloride

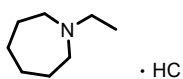

***N*-ethyl hexamethyleneimine hydrochloride**

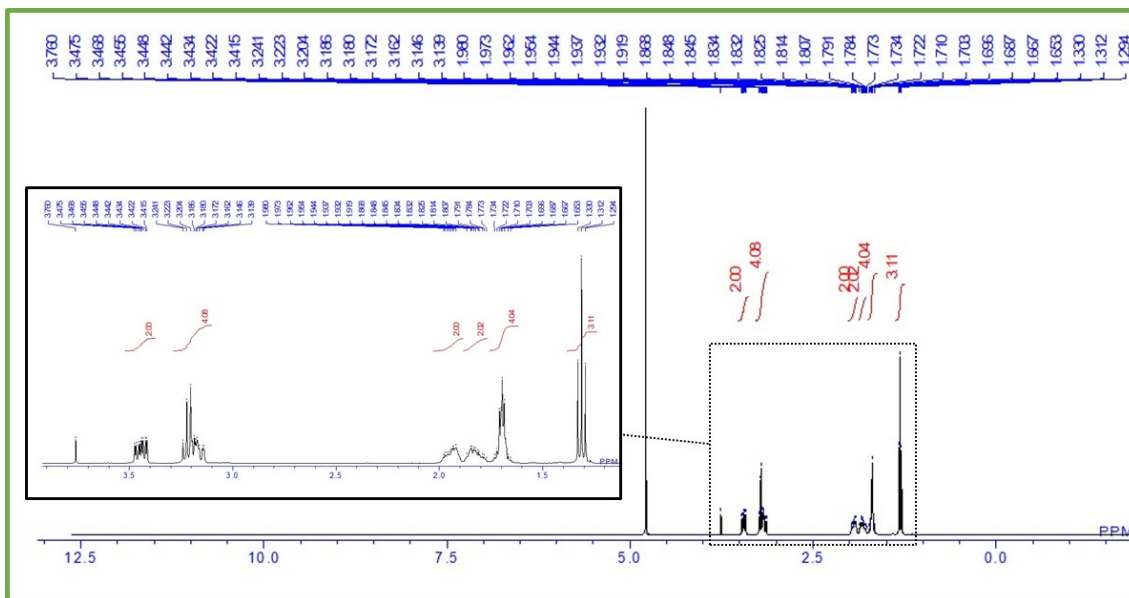

<sup>1</sup>H NMR spectrum of *N*-ethyl hexamethyleneimine hydrochloride

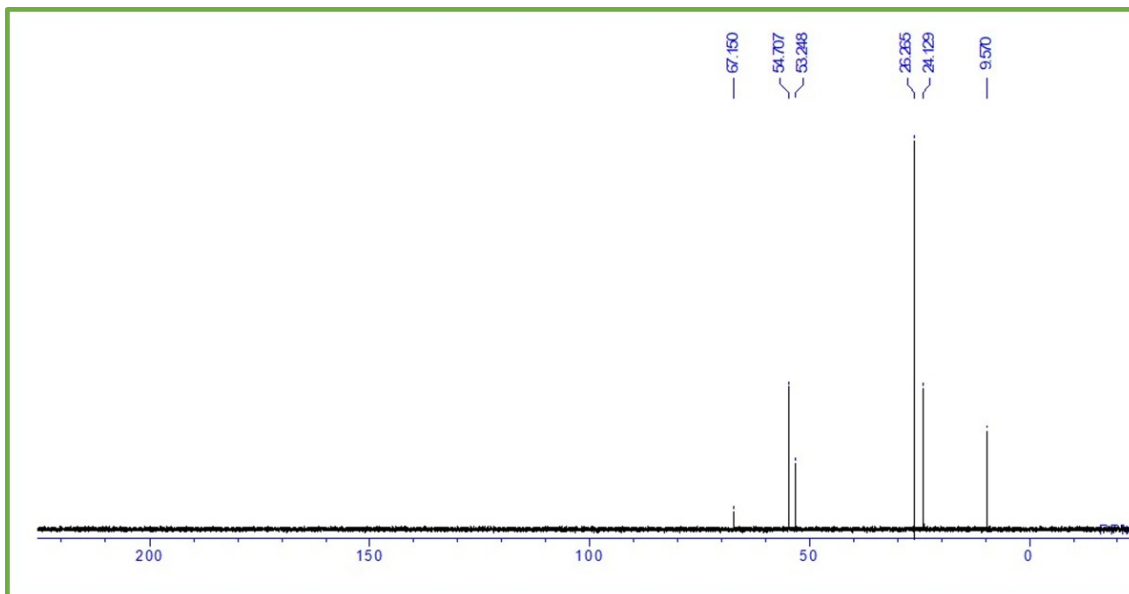

<sup>13</sup>C NMR spectrum of *N*-ethyl hexamethyleneimine hydrochloride

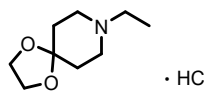

***N*-ethyl 4-piperidone ethylene ketal hydrochloride**

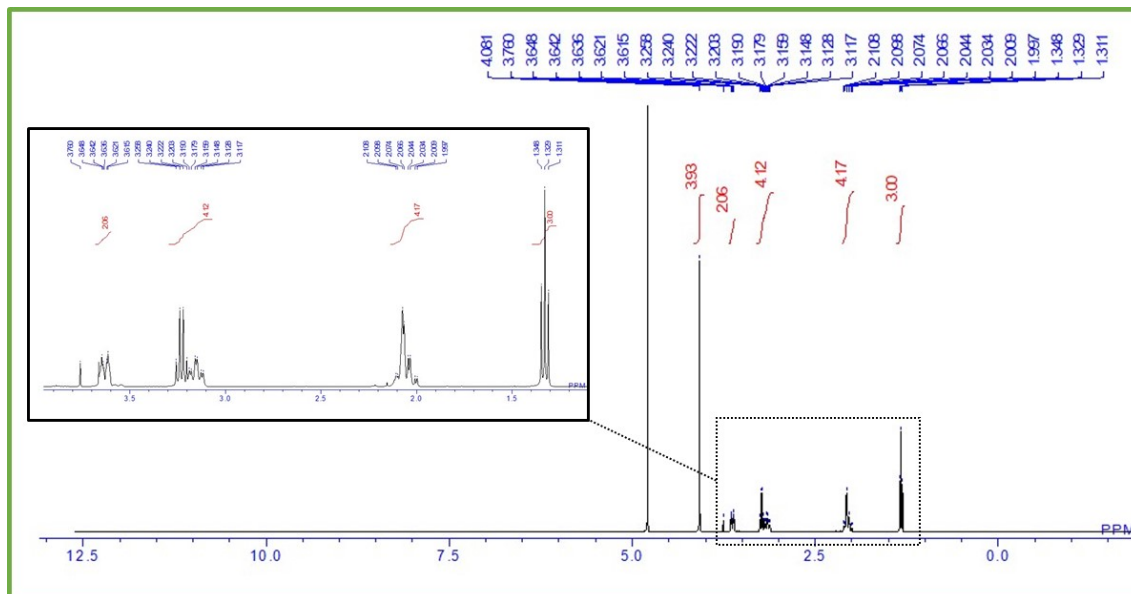

<sup>1</sup>H NMR spectrum of *N*-ethyl 4-piperidone ethylene ketal hydrochloride

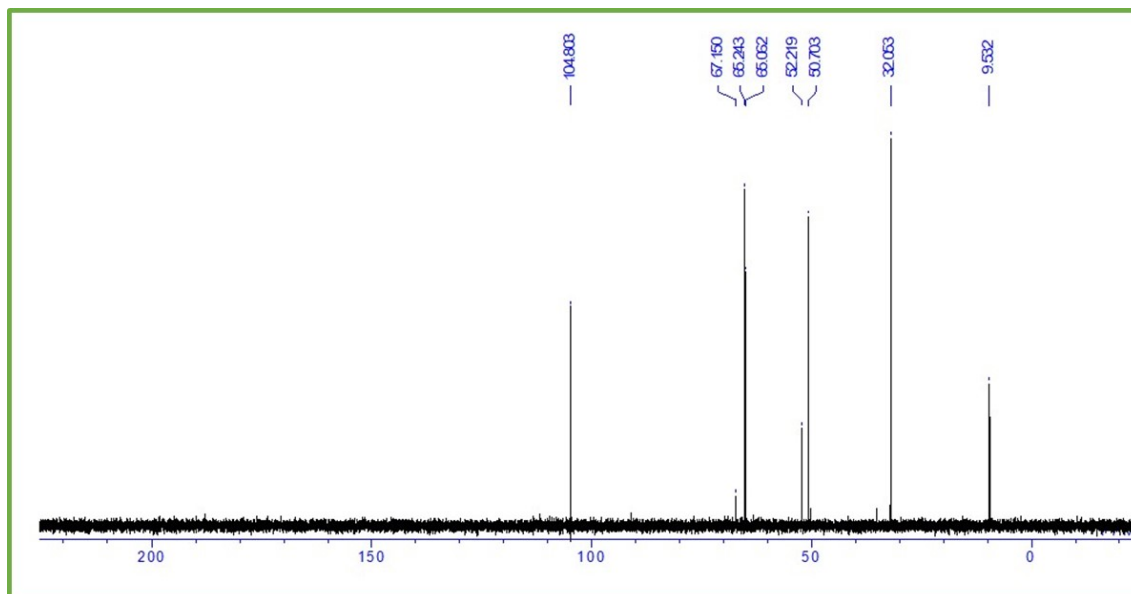

<sup>13</sup>C NMR spectrum of *N*-ethyl 4-piperidone ethylene ketal hydrochloride

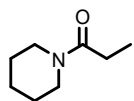

***N*-propionylpiperidine**

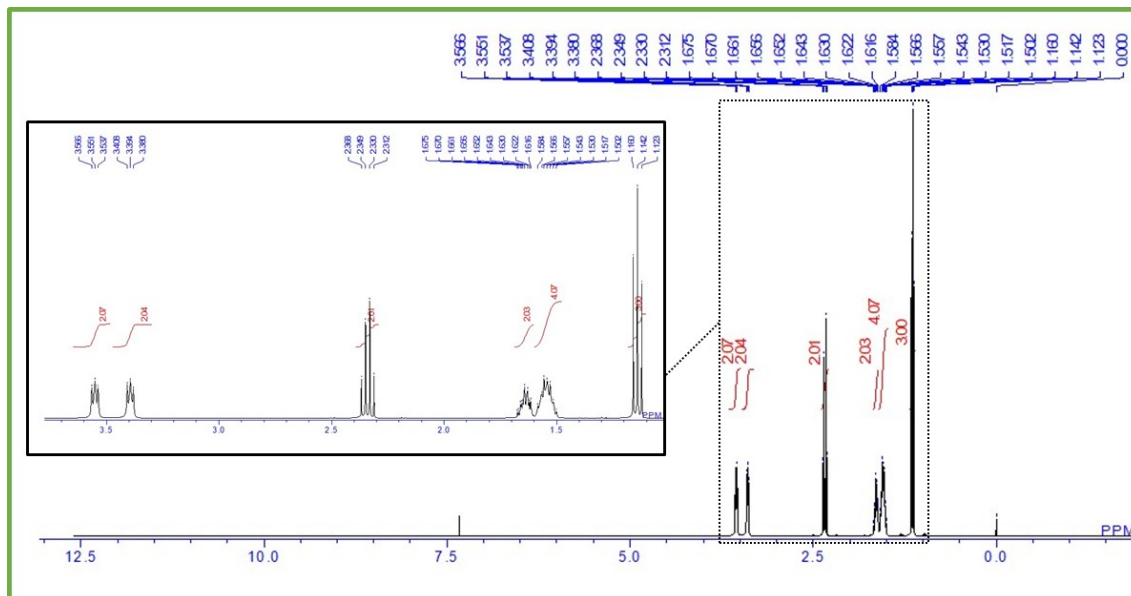

<sup>1</sup>H NMR spectrum of *N*-propionylpiperidine

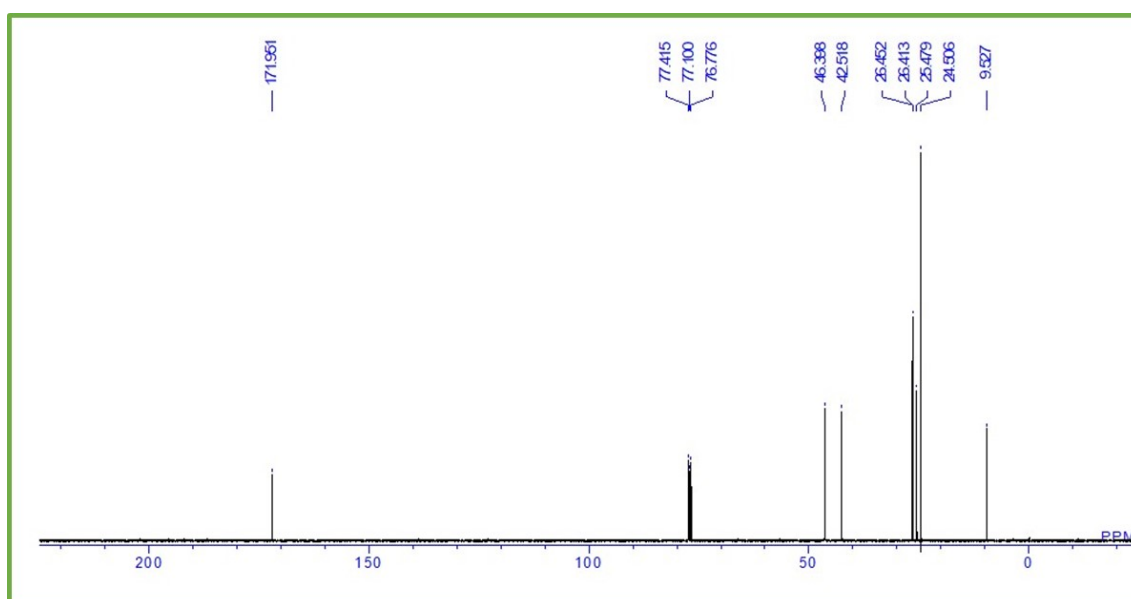

<sup>13</sup>C NMR spectrum of *N*-propionylpiperidine

## 7. References

- S1. D. A. Oare, M. A. Henderson, M. A. Sanner and C. H. Heathcock, *J. Org. Chem.*, 1990, **55**, 132–157.
- S2. A. A. N. Magro, G. R. Eastham and D. J. Cole-Hamilton, *Chem. Commun.*, 2007, 3154–3156.
- S3. I. Sorribes, J. R. Cabrero-Antonino, C. Vicent, K. Junge and M. Beller, *J. Am. Chem. Soc.*, 2015, **137**, 13580–13587.
- S4. Y. Shi, P. C. J. Kamer, D. J. Cole-Hamilton, M. Harvie, E. F. Baxter, K. J. C. Lim and P. Pogorzelec, *Chem. Sci.*, 2017, **8**, 6911–6917.
- S5. Y. Shi, P. C. J. Kamer and D. J. Cole-Hamilton, *Green Chem.*, 2017, **19**, 5460–5466.
- S6. T. Toyao, S. M. A. H. Siddiki, Y. Morita, T. Kamachi, A. S. Touchy, W. Onodera, K. Kon, S. Furukawa, H. Ariga, K. Asakura, K. Yoshizawa and K. Shimizu, *Chem. Eur. J.*, 2017, **23**, 14848–14859.
- S7. W. Liu, B. Sahoo, A. Spannenberg, K. Junge and M. Beller, *Angew. Chem. Int. Ed.*, 2018, **57**, 11673–11677.
- S8. B. Emayavaramban, P. Chakraborty and B. Sundararaju, *ChemSusChem*, 2019, **12**, 3089–3093.
- S9. R. Coeck and D. E. De Vos, *Green Chem.*, 2020, **22**, 5105–5114.
- S10. R. Coeck, J. Meeprasert, G. Li, T. Altantzis, S. Bals, E. A. Pidko and D. E. De Vos, *ACS Catal.*, 2021, **11**, 7672–7684.
- S11. W. Rachmady and M. A. Vannice, *J. Catal.*, 2002, **207**, 317–330.
- S12. C. Kaku, S. Sukanuma, K. Nakajima, E. Tsuji and N. Katada, *ChemCatChem*, 2022, **14**, e202200399.
- S13. E. P. Parry, *J. Catal.*, 1963, **2**, 371–379.
- S14. A. A. Bolzan, B. J. Kennedy and C. J. Howard, *Aust. J. Chem.*, 1995, **48**, 1473–1477.
